1 **Specification of distinct cell types in a sensory-adhesive organ for metamorphosis in the**  
2 ***Ciona* larva**

3 Christopher J. Johnson\*<sup>1</sup>, Florian Razy-Krajka\*<sup>1</sup>, Fan Zeng<sup>2</sup>, Katarzyna M. Piekarz<sup>1</sup>, Shweta  
4 Biliya<sup>3</sup>, Ute Rothbacher<sup>2</sup>, Alberto Stolfi<sup>1</sup>

5 Corresponding authors: [ute.rothbaecher@uibk.ac.at](mailto:ute.rothbaecher@uibk.ac.at), [alberto.stolfi@biosci.gatech.edu](mailto:alberto.stolfi@biosci.gatech.edu)

6 1. School of Biological Sciences, Georgia Institute of Technology, Atlanta, GA, USA

7 2. Department of Zoology, University of Innsbruck, Innsbruck, Austria

8 3. Molecular Evolution Core, Petit H. Parker Institute for Bioengineering and Bioscience,  
9 Georgia Institute of Technology, Atlanta, GA, USA

10 \* Equal contributions

11

12

13

14

15

16 **Abstract**

17 The papillae of tunicate larvae contribute sensory, adhesive, and metamorphosis-regulating  
18 functions that are crucial for the biphasic lifestyle of these marine, non-vertebrate chordates. We  
19 have identified additional molecular markers for at least five distinct cell types in the papillae of  
20 the model tunicate *Ciona*, allowing us to further study the development of these organs. Using  
21 tissue-specific CRISPR/Cas9-mediated mutagenesis and other molecular perturbations, we  
22 reveal the roles of key transcription factors and signaling pathways that are important for  
23 patterning the papilla territory into a highly organized array of different cell types and shapes.  
24 We further test the contributions of different transcription factors and cell types to the production  
25 of the adhesive glue that allows for larval attachment during settlement, and to the processes of  
26 tail retraction and body rotation during metamorphosis. With this study, we continue working  
27 towards connecting gene regulation to cellular functions that control the developmental  
28 transition between the motile larva and sessile adult of *Ciona*.

## 29 Introduction

30 Tunicates, the sister group to the vertebrates, comprise a diverse group of marine non-  
31 vertebrate chordates (Fodor et al., 2021; Lemaire, 2011). Most tunicate species are classified in  
32 the order Ascidiacea, commonly known as ascidians (Satoh, 2013), although phylogenetic  
33 evidence suggests this is not a monophyletic group within Tunicata (DeBiasse et al., 2020;  
34 Delsuc et al., 2018; Kocot et al., 2018). The majority of ascidians have a biphasic life cycle that  
35 alternates between a swimming larva and a sessile adult. The larva functions exclusively to  
36 disperse the species, not feeding until it has found a suitable location on which to settle and  
37 trigger metamorphosis (Karaïskou et al., 2015).

38 Recent work has started to reveal the cellular and molecular basis of larval settlement and  
39 metamorphosis. Key to the process of settlement and metamorphosis are the papillae, which  
40 comprise a set of three anterior sensory/adhesive organs in the laboratory model species of the  
41 genus *Ciona* and a majority of other ascidian genera as well (**Figure 1**)(Caicci et al., 2010;  
42 Torrence and Cloney, 1983; Turon, 1991; Zeng et al., 2019b). The papillae are composed of a  
43 few different cell types that have been characterized by both electron and fluorescence  
44 microscopy (Dolcemascolo et al., 2009; Pennati et al., 2009; Pennati et al., 2007; Zeng et al.,  
45 2019b). Several cells appear to secrete the “glue” or bioadhesive material required for the  
46 attachment of the larva to the substrate, termed “collocytes” (Zeng et al., 2019a; Zeng et al.,  
47 2019b). Other cells are clearly neuronal (four ciliated neurons per papilla)(Zeng et al., 2019b)  
48 and are required to trigger the onset of metamorphosis (Sakamoto et al., 2022), which was also  
49 recently shown to depend on mechanical stimulation of the papillae (Wakai et al., 2021). Finally,  
50 at the very center of each papilla are four “Axial Columnar Cells” (ACCs), which have been  
51 suggested to possess chemosensory and contractile properties (Poncelet and Shimeld, 2020;  
52 Poncelet et al., 2022; Turon, 1991). Although they have been called papilla “sensory cells” or  
53 “neurons”, they are not innervated and have little structural and molecular overlap with the other  
54 two cell types. Furthermore, single-cell RNA sequencing revealed that they do not express  
55 genes typically associated with neuronal function (Sharma et al., 2019).

56 In *Ciona*, previous work had established that the three papillae likely arise from three clusters of  
57 *Foxg+/Islet+* cells arranged roughly as a triangle- two dorsal clusters (left and right) and single  
58 ventral cluster (Liu and Satou, 2019; Wagner et al., 2014). Although *Foxg* is initially activated in  
59 an entire row of cells at the very anterior of the neural plate, *Sp6/7/8* (also known as *Zfp220* or  
60 *Buttonhead*) is required to refine this swath of expression down to three “spots” of *Foxg*, which  
61 required for expression of *Islet* in these cell clusters (**Figure 1**)(Liu and Satou, 2019). MEK/ERK

62 (e.g. MAPK) signaling also appears to play an important role in this refinement, as treatment  
63 with the MEK inhibitor U0126 results in a “U”-shaped band of *Islet* expression instead of three  
64 discrete foci (**Figure 1**)(Wagner et al., 2014). Similarly, BMP inhibition also causes a similar “U-  
65 shape” swath of *Foxg/Islet* expression, resulting in a single protrusion instead of the normal  
66 three, termed the “*cyrano*” phenotype (Liu et al., 2023; Roure et al., 2022). However, it has not  
67 been shown how these early specification events connect to the final cell type diversity and  
68 arrangement of the papillae.

69 Here we describe novel genetic markers and reporter constructs that allowed us to visualize  
70 each of the different cell type of the papillae, and follow their development upon various  
71 molecular perturbations targeting specific transcription factors or signaling pathways. We show  
72 that different transcription factors contribute to the specification of the different cell types, and  
73 that cell-cell signaling in the FGF/MAPK and Delta/Notch pathways are crucial for patterning  
74 and arranging these cells in the three papillae. Altering papilla development in different ways  
75 contributes to different processes of post-settlement larval body plan rearrangements, revealing  
76 the complex molecular and cellular underpinning of tunicate larval metamorphosis.

77

## 78 **Methods**

### 79 **Ciona handling**

80 *Ciona robusta (intestinalis Type A)* were shipped from San Diego (M-REP), while *Ciona*  
81 *intestinalis (Type B)* were shipped from Roscoff Biological Station, France. Eggs were fertilized  
82 *in vitro*, dechorionated, and electroporated following established protocols (Christiaen et al.,  
83 2009a, b; Kari et al., 2016). Unc-76 tags were used as a default for fluorescent proteins (FPs)  
84 for optimal cell labeling as previously described (Stolfi and Levine, 2011), which excludes the  
85 FPs from the nucleus and ensures transport down axons. Typically 40-100 µg of untagged or  
86 Unc-76-tagged FP plasmids and 10-35 µg of histone (H2B) fusion FP plasmids was used per  
87 700 µl of electroporation solution. For CRISPR, typically 35-40 µg of Cas9 plasmid and 25-40  
88 µg of each gRNA plasmid was used per 700 µl of electroporation solution, except when  
89 validating sgRNAs (see further below). Precise electroporation mixes for given perturbation  
90 experiments and controls are specified in the **Supplemental Sequence File**. *C. robusta*  
91 embryos were raised at 20°C and *C. intestinalis* embryos were raised at 18°C, unless otherwise  
92 specified. For U0126 treatment, U0126 stock solution resuspended in DMSO was diluted to 10

93  $\mu$ M final concentration in artificial seawater prior to transferring embryos at 7.5 hpf. Negative  
94 control embryos were transferred to seawater with the equivalent volume of DMSO vehicle.

95

## 96 **Fixation, staining, and imaging**

97 Embryos and larvae were fixed for fluorescent protein imaging in MEM-FA fixation solution  
98 (3.7% formaldehyde, 0.1 M MOPS pH 7.4, 0.5 M NaCl, 1 mM EGTA, 2 mM MgSO<sub>4</sub>, 0.1%  
99 Triton-X100), rinsed in 1X PBS, 0.4% Triton-X100, 50 mM NH<sub>4</sub>Cl and 1X PBS, 0.1% Triton-  
100 X100. For mRNA *in situ* hybridization, embryos/larvae were fixed in MEM-PFA fixation solution  
101 (4% paraformaldehyde, 0.1 M MOPS pH 7.4, 0.5 M NaCl, 1 mM EGTA, 2 mM MgSO<sub>4</sub>, 0.05%  
102 Tween-20) and *in situ* hybridization was carried out as previously described (Ikuta and Saiga,  
103 2007; Stolfi et al., 2011). All probe template sequences are shown in the **Supplemental**  
104 **Sequence File**. Immunolabeling of  $\beta$ -galactosidase and mCherry (alone or in conjunction with  
105 mRNA *in situ* hybridization) was carried out as previously described (Beh et al., 2007), on  
106 embryos/larvae using mouse anti- $\beta$ -gal (Promega catalog number Z3781, 1:1000) and rabbit  
107 anti-mCherry (BioVision, accession number ACY24904, 1:500) primary antibodies. Specimens  
108 were imaged on Leica DM IL LED or DMI8 inverted epifluorescence microscopes, with  
109 maximum Z projection processing and cell measurements performed in LAS X.

110 PNA staining was carried out on 4% PFA fixed larvae, using Tris-buffered saline (pH 8.0)  
111 supplemented with 5 mM CaCl<sub>2</sub> and 0.1% Triton X-100 (TBS-T). Unspecific background was  
112 blocked by 3% BSA in TBS-T for 2 hours at room temperature. Biotinylated Peanut Agglutinin  
113 (PNA; B-1075, Vector Laboratory) was diluted in BSA-TBS-T to a final concentration of 25  $\mu$ g/ml  
114 and applied to the specimen overnight at 4 °C. After several washes in TBS-T over 2 hours,  
115 larvae were incubated for 1 hour in fluorescent streptavidin (SA-5006, Vector Laboratory) diluted  
116 1:300 in BSA-TBS-T at room temperature. PNA stainings were imaged using a Leica SP5 II  
117 confocal scanning microscope. Stacks were acquired sequentially and z-projected. Images were  
118 analyzed with ImageJ (Version 1.52 h).

119

## 120 **CRISPR/Cas9 sgRNA design and validation**

121 The Cas9 (Stolfi et al., 2014) and Cas9::Geminin-Nterminus (Song et al., 2022) protein-coding  
122 sequences have been described before. Single-chain guide RNAs (sgRNAs) were designed  
123 using the CRISPOR website (Haeussler et al., 2016)([crispor.tefor.net](http://crispor.tefor.net)). Those sgRNAs with high

124 Doench '16 score, high MIT specificity score, and not spanning known SNPs were selected for  
125 testing. Validation of sgRNAs was performed by co-electroporation 25 µg of *Eef1a>Cas9* or  
126 *Eef1a>Cas9::Geminin-Nterminus* and 75 µg of the sgRNA plasmid, per 700 µl of total  
127 electroporation volume. Genomic DNA was extracted from pooled larvae electroporated with a  
128 single sgRNA, using the QIAamp DNA micro kit (Qiagen). PCR products spanning each sgRNA  
129 target site were amplified from the corresponding genomic DNA, with primers designed so that  
130 the amplicon was to be 150-450 bp in size. Amplicons were purified by QIAquick PCR  
131 purification kit (Qiagen) and submitted for Amplicon-EZ Illumina-based sequencing by  
132 Azenta/Genewiz (New Jersey, USA), which returned mutagenesis rates and indel plots.

133

### 134 **RNA sequencing and analysis**

135 Single-cell RNA sequencing (scRNAseq) data from Cao et al. 2019 were re-analyzed in Seurat  
136 (Satija et al., 2015). Combined larva stage data was clustered and plotted using 30 dimensions  
137 (**Supplemental Figure 1A**). Clusters 3 and 33 were determined to contain papilla cell types and  
138 were re-clustered separately, also using 30 dimensions (**Supplemental Figure 1B**). Differential  
139 gene expression plots (**Supplemental Figure 1C**) and tables (**Supplemental Table 1**) were  
140 explored to find candidate papilla cell type markers, to be confirmed by *in situ* hybridization  
141 (**Supplemental Figure 1D**) and/or reporter plasmids. All code and Seurat files can be  
142 downloaded from: <https://osf.io/sc7pr/>

143 Bulk RNA integrity numbers were determined using the Agilent Bioanalyzer RNA 6000 Nano kit  
144 and used as a QC measure. All samples with RINs over 7 were used for library preparation.  
145 mRNA was enriched using the NEBNext Poly(A) mRNA isolation module and Illumina  
146 compatible libraries were prepared using the NEBNext Ultra II RNA directional library  
147 preparation kit. QC on the libraries was performed on the Agilent Bioanalyzer 2100 and  
148 concentrations were determined fluorometrically. The libraries were then pooled and sequenced  
149 on the NovaSeq 6000 with an SP Flow Cell to get PE100bp reads.

150 The RNA-seq raw files were analyzed in Galaxy hub (usegalaxy.org)(Afgan et al., 2022). Firstly,  
151 the raw fastq files were inspected using FastQC Read Quality Reports (Galaxy Version  
152 0.73+galaxy0) and MultiQC (Galaxy Version 1.11+galaxy0). The reads were then filtered and  
153 trimmed with Cutadapt (Galaxy Version 4.0+galaxy0). The minimum read length was set to 20  
154 and the reads that did not meet the quality cutoff of 20 were discarded. Then, FastQC and  
155 MultiQC were used again to assess the resulting files after filtering and trimming. Next, the

156 technical replicates were combined and used as the input to the mapping tool (RNA STAR,  
157 Galaxy Version 2.7.8a+galaxy0, length of the SA pre-indexing string of 12), together with the  
158 custom *Ciona* reference genome sequence and gene model files (KY21, both obtained from the  
159 Ghost Database; [http://ghost.zool.kyoto-u.ac.jp/download\\_ht.html](http://ghost.zool.kyoto-u.ac.jp/download_ht.html))(Satou et al., 2022). The  
160 counts were generated using featureCounts (Galaxy Version 2.0.1+galaxy2; minimum mapping  
161 quality per gene was set to 10). Lastly, the differential gene expression analysis (**Supplemental**  
162 **Table 2**) was performed with DESeq2 (Galaxy Version 2.11.40.7+galaxy1). KY21 gene models  
163 were linked to KH gene models using the Ciona Gene Model Converter application  
164 [https://github.com/katarzynampiekarz/ciona\\_gene\\_model\\_converter](https://github.com/katarzynampiekarz/ciona_gene_model_converter) (Piekarz and Stolfi, *under*  
165 *review*). Raw sequencing reads available from the SRA database under accession  
166 PRJNA949791. Analysis code and files can be found at: <https://osf.io/wzrdk/>

167

## 168 **Quantification of ACC length in *Villin* CRISPR larvae**

169 Larvae subjected to papilla-specific knockout of *Villin* (using *Foxc>Cas9*, see **Supplemental**  
170 **Sequence File** for detailed electroporation recipe) and negative control larvae were fixed at 17  
171 hpf, 20°C and mounted as above. *CryBG>Unc-76::GFP+* cells were imaged on a Leica DMI8  
172 inverted epifluorescence microscope and the greatest distance between the apical and basal  
173 extremities of each GFP+ papilla was measured in LAS X, based on visible GFP fluorescence  
174 at a given focal plane.

175

## 176 **Results**

### 177 **Identification of novel markers and reporters for specific cell types in the papillae**

178 We searched *Ciona robusta* (i.e. *intestinalis* Type A) whole-larva single-cell RNA sequencing  
179 (scRNAseq) data (Cao et al., 2019) for evidence of the cell types described by transmission  
180 electron microscopy (TEM) of the papillae (Zeng et al., 2019b). While a cell cluster annotated as  
181 “Palp Sensory Cells” (PSCs) appeared enriched for known markers of ACCs like *CryBG*  
182 (*KH.S605.3*) and *KH.C3.516* (Sharma et al., 2019; Shimeld et al., 2005), genes expressed in  
183 other papilla cell types were also enriched in this cluster as well, including *Sp6/7/8* (*KH.C13.22*)  
184 (Liu and Satou, 2019; Wagner et al., 2014) and *Pou4* (*KH.C2.42*)(Roure et al., 2022; Sakamoto  
185 et al., 2022). Re-analysis and reclustering of these data revealed novel potential markers for  
186 these different cell types within the cluster (**Supplemental Figure 1A-C, Supplemental Table**

187 1). We performed *in situ* mRNA hybridization for several of these PSC candidate markers in *C.*  
188 *robusta* larvae (**Supplemental Figure 1D**). As we had hoped, they appeared to label different  
189 cells in the papilla territory. Some appeared to label cells in the center of each papilla, while  
190 others were expressed in cells surrounding or on the outermost edges of each papilla. These  
191 vastly different expression patterns supported the idea of mixed cell identities in the PSC  
192 scRNAseq cluster.

193 To further confirm the expression patterns of these and other candidate markers, we made  
194 reporter plasmids from their upstream *cis*-regulatory sequences and electroporated these into  
195 *Ciona* embryos. None of the selected genes showed any appreciable homology to genes of  
196 known function in other organisms, but we reasoned that they might serve as useful markers for  
197 specific papilla cell types. First, a *KH.L96.43* reporter (“*L96.43>GFP*”) was expressed in cells  
198 surrounding and in between the three papillae (**Figure 2A**). Co-electroporation with the papilla-  
199 specific *Foxg>mCherry* reporter (Cao et al., 2019) showed clear, mutually-exclusive expression  
200 between the two reporters. We propose that L96.43 marks a population of “peri-papillary” and/or  
201 “inter-papillary” cells previously identified as “basal cells” that are part of the larger papilla region  
202 but excluded from the three protruding, *Foxg+* papillae *sensu stricto* (Zeng et al., 2019b).

203 Next, we further confirmed that the Papilla Neurons (PNs) are distinct from the ACCs (Zeng et  
204 al., 2019b). Previously identified as a potential PN marker by *in situ* hybridization (Razy-Krajka  
205 et al., 2014), a *TGFB* reporter clearly labeled PNs (**Figure 2B, Supplemental Figure 2A**),  
206 which are distinguished as the only papilla cell types bearing an axon. However, co-  
207 electroporation of *TGFB* reporter with an ACC-specific *CryBG* reporter (Shimeld et al., 2005)  
208 resulted in “cross-talk”, or cross-plasmid transvection (**Supplemental Figure 2B**). Indeed, other  
209 PN-specific reporters tested did not cross-talk with *CryBG*, including the previously published  
210 *Gnrh1* (Kusakabe et al., 2012), and the novel marker *KH.C4.78* (“*C4.78>GFP*”)(**Supplemental**  
211 **Figure 2C-E**). Interestingly, PN axons continued to extend posteriorly during the swimming  
212 phase to contact the anterior axon branches of the Bipolar Tail Neurons (**Figure 2B**), which  
213 project their posterior axon branches to the very tip of the tail (Imai and Meinertzhagen, 2007).  
214 This hints at a potential mechanism for transducing sensory information from the papillae to the  
215 tail tip where tail retraction initiates, especially during later time points when larvae are  
216 competent to settle (Matsunobu and Sasakura, 2015).

217 Double electroporation with *KH.C4.78* and *Foxg* reporters (**Figure 2C, Supplemental Figure**  
218 **2C**) revealed that, unlike the basal cells, PNs are specified from *Foxg+* cells in the papillae.  
219 However, co-electroporation with a papilla-specific *Islet* reporter plasmid also revealed that PNs

220 are adjacent to but distinct from the central *Islet+* “core” of each papilla (**Figure 2D**). In contrast,  
221 a *KH.C11.360* reporter (“*C11.360>GFP/mCherry*”) labeled cells that were both *Foxg+* and  
222 *Islet+*, but were clearly not the ACCs (**Figure 2E-G**). The *C11.360+* cells were adjacent to the  
223 ACCs but lacked the thin protrusions into the hyaline cap that are typical of the ACCs, and also  
224 lacked axons typical of the PNs. Therefore, these cells appear to be collocytes, proposed to be  
225 adhesive-secreting cells responsible for attachment to the substrate during larval settlement  
226 (Zeng et al., 2019b).

227 Previous characterization of the papillae by TEM described 12 collocytes in each papilla (Zeng  
228 et al., 2019b), yet the *C11.360* reporter appeared to only label at most four cells per papilla. This  
229 suggested the existence of cryptic collocyte subtypes. In fact, those same TEM images showed  
230 certain qualitative differences in cytoplasmic contents between peripheral collocytes and the  
231 more central collocytes (Zeng et al., 2019b). Indeed, we identified another reporter, that of the  
232 gene *KH.L141.36* (“*L141.36>GFP*”), that labeled *Foxg+* but *Islet-*negative cells that are at the  
233 periphery of each papilla but that are not PNs (**Figure 2H,I**). Co-electroporation of *L141.36* and  
234 *C11.360* reporters labelled mutually-exclusive groups of cells (**Figure 2J**). We propose that  
235 these respective reporters delineate more peripheral, or “outer” collocytes (OCs) vs. more  
236 central, or “inner” collocytes (ICs). Interestingly, *KH.L141.36* reporter expression was only  
237 visible at 20 hpf, not at 17 hpf like most of the other reporters described.

238 When using these *C. robusta* reporter plasmids to electroporate the closely related *C.*  
239 *intestinalis* (i.e. Type B) sourced from Roscoff, France (Pennati et al., 2015), we noticed that  
240 their expression was very weak (data not shown). This led us to re-cloning the orthologous  
241 sequences from the *C. intestinalis* Type B genome (Satou et al., 2021)(**Supplemental**  
242 **Sequence File**). Electroporation of Type B embryos with Type B-specific reporter plasmids  
243 resulted in much stronger, reliable expression (**Figure 2K,L**). This suggests relatively significant  
244 changes to the *cis*-regulatory sequences of these cell type-specific genes in these otherwise  
245 nearly indistinguishable cryptic species.

246 Although we also obtained additional reporters that labeled one or more different papilla cell  
247 types (**Supplemental Figure 2F,G**), we now had a full set of papilla cell type-specific marker  
248 genes and reporter plasmids for a deeper investigation of papilla patterning and development  
249 (**Figure 2M**). Finally, it is also important to note that some of these reporters also label cell types  
250 outside the papillae.

251



252 **Specification of ACCs, ICs, and OCs by *Islet* and *Sp6/7/8* combinatorial logic**

253 How are the cell types of the papillae (ACCs, ICs, OCs, and PNs) specified? *In situ* mRNA  
254 hybridization previously revealed partially overlapping expression territories of three genes  
255 encoding sequence-specific transcription factors (**Figure 3A**): a central domain of *Islet*<sup>+</sup> cells,  
256 surrounded by a ring of cells that express both *Islet* and *Sp6/7/8* (and *Emx*, though distinct from  
257 the earlier expression of *Emx* at neurula stages), and additional cells surrounding them  
258 expressing only *Sp6/7/8* (Wagner et al., 2014). Additionally, overexpression of *Islet* had been  
259 previously shown to generate a single large papilla expressing the ACC reporter *CryBG>GFP*  
260 (Wagner et al., 2014). We therefore asked whether these transcription factors might be  
261 patterning the papillae into an ordered array of cell types (**Figure 3A**).

262 First we asked, does *Islet* specify the centrally-located ACCs and ICs? To test this, we turned to  
263 tissue-specific CRISPR/Cas9-mediated mutagenesis (Stolfi et al., 2014). To knock out *Islet* in  
264 the papillae, we electroporated a previously validated sgRNA expression construct targeting its  
265 intron/exon 2 boundary (*U6>Islet.2*, 44% mutagenesis efficacy, **Supplemental Figure**  
266 **3**)(Gandhi et al., 2017) together with *Foxc>Cas9*. Papilla-specific CRISPR-based knockout of  
267 *Islet* and resulting loss of ACC cell fate was confirmed by loss of *CryBG>GFP* expression,  
268 compared to negative control individuals electroporated instead with previously published  
269 *U6>Control* sgRNA vector (Stolfi et al., 2014) targeting no sequence (**Figure 3B,C**). Therefore,  
270 we conclude that *Islet* is required for the specification and differentiation of ACCs. A smaller  
271 portion of larvae completely lost expression of the IC reporter, *C11.360>GFP*, but expression  
272 was still substantially reduced relative to the control (**Figure 3B,C**). This difference might be due  
273 to lower sensitivity of the IC reporter to *Islet* knockout, or might simply reflect the lower level of  
274 mosaicism of *C11.360>GFP* expression observed in the control.

275 To test whether *Islet* is required for other cell types of the papillae, we repeated papilla-specific  
276 *Islet* CRISPR knockout using our different reporters to monitor the specification or differentiation  
277 of OCs (*L141.36>GFP*) and PNs (*TGFB>GFP*). While *Islet* knockout altered the general  
278 morphology of the papillae (see further below), it did not cause any noticeable loss of OC or PN  
279 reporter expression (**Figure 3B,C**). We therefore conclude that *Islet* is required for the  
280 specification and/or differentiation of ACCs and ICs, but not OCs or PNs.

281 Because it was reported that an outer *Emx*<sup>+</sup> “ring” of *Islet*<sup>+</sup> cells in each papilla co-express  
282 *Sp6/7/8* (Wagner et al., 2014), we hypothesized that *Sp6/7/8* might be required for a fate choice  
283 between ACCs and ICs. Corroborating the idea that these outer *Islet*<sup>+</sup> cells are specified as ICs,

284 we cloned an intronic *cis*-regulatory element from the *Emx* gene that is sufficient to drive late  
285 expression specifically in ICs (**Supplemental Figure 2F**). This late ring of *Emx* expression is not  
286 to be confused with the earlier expression of *Emx* in *Foxc*+/*Foxg*-negative cells at the neurula  
287 stage (Liu and Satou, 2019), which represent a distinct lineage (**Figure 1**). To test the role of  
288 *Sp6/7/8* in IC vs. ACC fate choice, we used the papilla-specific *Islet* *cis*-regulatory element to  
289 overexpress *Islet* or *Sp6/7/8*. While *Islet>Islet* did not reduce expression of either reporter,  
290 *Islet>Sp6/7/8* specifically abolished ACC reporter expression, but not that of the IC reporter  
291 (**Figure 4A,B**). In fact, IC reporter expression appeared to be slightly expanded in ~29% of  
292 larvae electroporated with *Islet>Sp6/7/8*. Taken together, these results suggest that  
293 overexpression of *Sp6/7/8* in the *Islet*+ cells of the papillae is sufficient to convert ACCs to an  
294 IC-like cell fate instead.

295 To further show that the combination of *Islet* and *Sp6/7/8* is sufficient to specify IC cell fate, we  
296 used the *Foxc* promoter to drive expression of *Islet*, *Sp6/7/8*, or a combination of both in the  
297 entire papilla territory. *Foxc>Islet* alone strongly promoted ACC reporter expression, as  
298 previously reported (Wagner et al., 2014), but resulted in more scattered IC reporter expression  
299 (**Figure 4C,D**). In contrast, co-electroporation of *Foxc>Islet* and *Foxc>Sp6/7/8* resulted in a  
300 large, single papilla expressing predominantly the IC reporter, not the ACC reporter (**Figure**  
301 **4C,D**).

302 Finally, we performed papilla-specific CRISPR knockout of *Sp6/7/8*, following the same strategy  
303 for *Islet* detailed above, using new sgRNAs that we designed and validated (**Supplemental**  
304 **Figure 3**). Indeed, CRISPR/Cas9-mediated mutagenesis of *Sp6/7/8* in the papilla territory  
305 resulted in loss of IC cell fate, as assayed by expression of *C11.360>GFP* (**Figure 4C,E**). In  
306 contrast, the same perturbation did not diminish the expression of the ACC reporter (**Figure**  
307 **4C**).

308 We noticed that *Foxc>Sp6/7/8* alone resulted in a large proportion of larvae lacking either ACC  
309 or IC reporter expression (**Figure 4D**). This suggested the possibility that *Sp6/7/8* alone might  
310 be promoting another papilla cell fate. Indeed, we found that *Sp6/7/8* knockout by CRISPR  
311 abolishes the expression of the OC reporter (*L141.36>GFP*), while *Foxc>Sp6/7/8* expands it  
312 slightly (**Figure 4C,D,F**). In contrast, *Foxc>Islet* alone or in combination with *Foxc>Sp6/7/8*  
313 suppressed OC reporter expression (**Figure 4C,D**), while *Islet* knockout did not affect it, as  
314 shown further above (**Figure 3B,C**). Taken together, these results suggest that a combinatorial  
315 transcriptional logic underlies papilla cell fate choices between ACCs (*Islet* alone), ICs (*Islet* +  
316 *Sp6/7/8*), and OCs (*Sp6/7/8* alone).

317

## 318 **Identifying the adhesive-secreting cells of the papillae**

319 Previous data revealed peanut agglutinin (PNA) staining as a marker for glue-secreting cell  
320 granules, the adhesive papillary cap, and adhesive prints left by larvae on the substrate (Zeng  
321 et al., 2019a; Zeng et al., 2019b). The delineation of two colocyte populations opened the  
322 question of whether both (ICs and OCs) are equally PNA-positive. To answer this question, we  
323 performed PNA stainings on larvae expressing IC or OC reporter plasmids (**Figure 5A,B**).  
324 Interestingly, ICs contained PNA-stained granules only at the very apical tip (**Figure 5A**,  
325 **Supplemental Movie 1**), while the majority of PNA-stained granules were not within the ICs  
326 (**Figure 5A**). Consistently, the OCs were the main cells showing PNA-stained granules located  
327 within the papillae (**Figure 5B, Supplemental Movie 2**). This distribution of PNA staining  
328 corresponds to the distribution of granules previously identified by high-pressure freezing  
329 electron microscopy (Zeng et al., 2019b), in which colocytes located in the central core of the  
330 papilla contain granules mostly at their apical end. Indeed, in cross-sections, granules were  
331 most abundant inside the papillary body, likely in cells identified here as OCs.

332 To further demonstrate that both ICs and OCs are likely glue-secreting cells, we performed PNA  
333 staining on larvae in distinct perturbation conditions. Namely, we electroporated larvae with  
334 *Foxc>Sp6/7/8*, which was shown above to suppress IC specification, or with *Foxc>Islet* and  
335 *Foxc>Sp6/7/8* combined, which was shown to convert most of the papilla territory into ICs.  
336 Although *Foxc>Sp6/7/8* eliminated most IC reporter expression (**Figure 5C,E**), PNA staining  
337 was still present, likely due to continued presence of OCs. Similarly, although *Foxc>Islet* +  
338 *Foxc>Sp6/7/8* resulted in a single enlarged papilla with supernumerary ICs (**Figure 5D,E**), the  
339 entire papilla was often covered by PNA staining (**Figure 5D**). Taken together, these results  
340 suggest that both ICs and OCs contribute to the production of adhesive material.

341

## 342 **Specification of PNs and OCs from cells that downregulate Foxg**

343 With the specification of ACCs/ICs/OCs explained in large part due to overlapping expression  
344 domains of *Islet* and *Sp6/7/8*, the precise developmental origins of the PNs and OCs still  
345 remained elusive. While it has become clear that the *Islet*<sup>+</sup> cells at the core of each papilla give  
346 rise to ACCs and ICs, Papilla-specific *CRISPR* knockout of *Islet* did not abolish PNs or OCs, as  
347 shown above (**Figure 3**). This suggested they do not arise from these core *Islet*<sup>+</sup> cells,

348 consistent with their more lateral positions as shown previously by TEM (Zeng et al., 2019b).  
349 Furthermore, recently published *in situ* hybridization data showing presumptive *Pou4*-  
350 expressing PN precursors surrounding *Islet*-expressing cells at late tailbud stage (Roure et al.,  
351 2022). Indeed, co-electroporation of *Islet* reporter and PN- or OC-specific reporter plasmids  
352 clearly showed PNs and OCs immediately adjacent to, but distinct from, *Islet*+ cells (**Figure**  
353 **2D,I**).

354 Might PNs and OCs be arising from the cells in between (and flanking) the three spots that  
355 downregulate *Foxg* (via repression by *Sp6/7/8*) and do not go on to express *Islet* (**Figure**  
356 **6A**)(Liu and Satou, 2019; Roure et al., 2022; Wagner et al., 2014)? To test this, we used the  
357 MEK (MAPK kinase) inhibitor U0126 to expand *Islet* expression as previously done (**Figure**  
358 **6A**)(Wagner et al., 2014). While treatment with 10  $\mu$ M U0126 at 7.5 hpf (between neurula and  
359 early tailbud stages) predictably expanded *Islet* reporter expression, it also eliminated  
360 expression of the PN reporter *C4.78>GFP*, as well as that of the OC reporter *L141.36>GFP*  
361 (**Figure 6B,C**). These results suggest that *Foxg*+ papilla cells that maintain *Foxg* expression go  
362 on to express *Islet* and give rise to ACCs and ICs, while the cells that activate *Sp6/7/8* and  
363 downregulate *Foxg* in response to MAPK signaling go on to give rise to OCs and PNs instead.

364

### 365 **PNs are specified by common peripheral neuron regulators**

366 Previous papilla-specific TALEN knockout of the neuronal transcription factor-encoding gene  
367 *Pou4* successfully eliminated PNs and the larva's tail resorption response to mechanical stimuli  
368 (Sakamoto et al., 2022). *Pou4* has been previously implicated in a *Myt1*-dependent regulatory  
369 cascade that specifies the caudal epidermal neurons (CENs) of the tail, from neurogenic midline  
370 cells expressing the proneural bHLH transcription factor *Ascl.a* (*KH.L9.13*, sometimes called  
371 *Ascl2* or *Ascl.b* previously)(Pasini et al., 2006; Roure et al., 2022; Roure and Darras, 2016;  
372 Tang et al., 2013; Waki et al., 2015). To precisely visualize the neurogenic cells of the papillae,  
373 we performed double (two-color) mRNA *in situ* hybridization for *Ascl.a* and *Foxg* at the mid-  
374 tailbud stage. Indeed, *Ascl.a* expression was seen broadly in the papilla territory surrounding the  
375 three *Foxg*+ cell clusters (**Figure 6D**). This was confirmed by an *Ascl.a* fluorescent protein  
376 reporter plasmid that labeled a broad set of papilla territory cells, including PNs and their axons  
377 (**Figure 6E**). Furthermore, a previously published *Myt1* reporter (Tolkin and Christiaen, 2016)  
378 was also found to be expressed in the PNs (**Figure 6F**). Double *in situ* of *Pou4* and *Foxg*  
379 revealed *Pou4*+ cells surrounding each *Foxg*+ cluster, corroborating a recent report (Roure et

380 al., 2022)(**Figure 6G**). It was not immediately clear which Pou4+ cells were PN precursors and  
381 which were nearby Rostral Trunk Epidermal Neuron (RTEN) precursors. Based on our images  
382 and those of the most recent study (Roure et al., 2022), we propose that there are initially two  
383 Pou4+ cells per papilla, later dividing to give rise to the four PNs per papilla as previously  
384 described (Zeng et al., 2019b). This would mirror the development of the epidermal neurons of  
385 the tail, in which neurons are born side-by-side as pairs after a final cell division by a committed  
386 mother cell (Pasini et al., 2006). Papilla-specific CRISPR knockout of *Pou4* with new sgRNAs  
387 (**Supplemental Figure 3**) recapitulated the loss of PN differentiation by the previously published  
388 TALEN knockout (Sakamoto et al., 2022), as assayed by *C4.78* reporter expression (**Figure**  
389 **6H,I**). In contrast, *Pou4* knockout had no effect on the specification of ACCs or OCs, suggesting  
390 *Pou4* function is specific for PN fate in the papillae (**Supplemental Figure 4**). Taken together,  
391 these results suggest that PNs are specified from interspersed neurogenic progenitors that are  
392 carved out by MAPK signaling through Sp6/7/8-dependent repression of *Foxg/Islet*.

393

#### 394 **Notch signaling regulates the fate choice between PNs and OCs**

395 Because both OCs and PNs appeared to arise from *Foxg*-downregulating, *Islet*-negative cells,  
396 we sought to test whether an additional regulatory step is required for the fate choice between  
397 these two cell types. In the neurogenic midline territory of the tail epidermis, lateral inhibition by  
398 Delta/Notch signaling regulates the final number and spacing of CENs (Chen et al., 2011; Pasini  
399 et al., 2006; Tang et al., 2013). Delta/Notch limits the expression of *Myt1*, which in turn activates  
400 *Pou4* expression. We therefore decided to test whether a similar mechanism in controlling the  
401 number of PNs and OCs surrounding each papilla. To test the requirement of Delta/Notch, we  
402 overexpressed a DNA-binding mutant of the Notch co-factor RBPJ/SUH (SUH-DBM)(Hudson  
403 and Yasuo, 2006). Indeed, electroporation with *Foxc>SUH-DBM* resulted in loss of OC reporter  
404 expression (**Figure 6J**), and concomitant expansion of PN reporter expression (**Figure 6K**). We  
405 conclude that Delta/Notch signaling regulates PN vs. OC fate choice in neurogenic progenitor  
406 cells surrounding each presumptive papilla, with Notch delimiting the specification of  
407 supernumerary neurons, thus allowing OCs to form (**Figure 6L**). This common origin of PNs  
408 and OCs is also supported by the recent finding that the latter appear to have basal bodies like  
409 the PNs, but without the accompanying sensory cilia (Zeng et al., 2019b). Interestingly, papilla-  
410 specific knockout of *Foxg* resulted in moderate loss of PN reporter expression (*TGFB>GFP*),  
411 and very little effect on the OC reporter (**Supplemental Figure 4**). This suggests differing

412 requirement for *Foxg* in different cell type-specific branches of the papilla regulatory network,  
413 despite all these cell types arising from cells that initially express *Foxg*.

414

#### 415 **Regulation of papilla morphogenesis by *Islet***

416 It was previously shown that *Foxg* or *Islet* overexpression induces the formation of a single  
417 enlarged “megapapilla”, in which all cells are substantially elongated relative to the rest of the  
418 epidermis (Liu and Satou, 2019; Wagner et al., 2014). We have shown above that this appears  
419 to be driven by expansion of ACCs and/or ICs, which are atypically elongated in the apical-basal  
420 direction and form apical protrusions and microvilli. *Islet* is sufficient for apical-basal elongation  
421 of epidermal cells (Wagner et al., 2014), and morpholino-knockdown of *Foxg* (which is upstream  
422 of *Islet*) also impairs proper papilla morphogenesis (Liu and Satou, 2019). We asked if *Islet* is  
423 required for papilla morphogenesis, using papilla-specific CRISPR knockout of *Islet*. Knocking  
424 out *Islet* in the papilla territory impaired the formation of the typically “pointy-shaped” papillae,  
425 resulting instead in blunt cells with flat, broader apical surfaces (**Figure 7A,B**). This result  
426 suggested that transcriptional targets downstream of *Islet* might be regulating the distinct cell  
427 shape of ACCs/ICs.

428 To identify potential candidate effectors of morphogenesis downstream of *Islet*, we used bulk  
429 RNAseq to measure differential gene expression between different *Islet* perturbation conditions  
430 (**Figure 7C**). We compared “negative control” embryos to (1) embryos in which *Islet* was  
431 overexpressed in the whole territory using the *Foxc* promoter (*Foxc>Islet*), and (2) embryos in  
432 which *Islet* was knocked out specifically in the papilla lineage by CRISPR/Cas9. For this, we  
433 designed an additional sgRNA targeting the first exon of *Islet*, to be used in combination with the  
434 already published sgRNA to generate larger deletions. This new sgRNA vector, which we  
435 named *U6>Islet.1*, resulted in a mutagenesis efficacy of 20%. (**Supplemental Figure 3**).

436 Whole embryos from each condition were collected at 12 hpf (*Islet* conditions) at 20°C in  
437 biological triplicate. RNA was extracted from pooled embryos in each sample, and RNAseq  
438 libraries were prepared from poly(A)-selected RNAs and sequenced by Illumina NovaSeq. This  
439 bulk RNAseq approach revealed that *Islet* overexpression results in the upregulation of several  
440 ACC markers from previous scRNAseq analysis (**Supplemental Table 2**)(Sharma et al., 2019).  
441 With *Islet* overexpression, this included ACC markers previously validated by mRNA *in situ*  
442 hybridization or reporter gene expression, such as *CryBG* and *Atp2a* (*KH.L116.40*). Many ACC  
443 markers were conspicuously absent, but this may be due to the relatively early timepoint (12

444 hpf, late tailbud stage), well before hatching and ACC differentiation. This was a deliberate  
445 choice, as we were focused on papilla morphogenesis, which begins around this stage (Wagner  
446 et al., 2014). One resulting candidate *Islet* target revealed by RNAseq was *Astl-related*  
447 (*KH.C9.850*), and its expression in the *Islet*<sup>+</sup> cells of the papillae was confirmed by *in situ*  
448 hybridization (**Supplemental Figure 5A**). Indeed, *Islet* knockout by CRISPR eliminated *Astl-*  
449 *related* reporter expression, supporting our approach to identifying new targets of *Islet*  
450 (**Supplemental Figure 5B,C**)

451 One particularly interesting ACC-specific candidate that was amongst the genes most highly  
452 upregulated by *Islet* overexpression was *Villin* (*KH.C9.512*), an ortholog of the *Villin* family of  
453 genes encoding effectors of actin regulators (Khurana and George, 2008). We confirmed the  
454 expression of *Villin* in the papillae by *in situ* hybridization and reporter plasmids (**Figure 7C-E**).  
455 In the *Islet* CRISPR condition, *Villin* was the top downregulated gene by *Islet* CRISPR knockout  
456 as well. *Villin* reporter expression was reduced in intensity but not completely lost upon  
457 knockout of *Islet* by CRISPR (68/100 electroporated larvae were still GFP<sup>+</sup>, vs. 97/100 in the  
458 negative control, **Figure 7H**), yet was also dramatically upregulated by *Islet* overexpression  
459 (94/100 larvae, **Figure 7I**). This suggests partially redundant activation of *Villin* by another  
460 factor, likely at earlier developmental stages (e.g. by *Foxc* or *Foxg*), and that *Islet* might be  
461 required for its sustained expression specifically in the central cells of the papilla throughout  
462 morphogenesis. This is consistent with the weak but broad expression of *Villin*>*GFP* in the  
463 entire papilla territory (**Figure 7E**).

464 To show that *Villin* is required for proper morphogenesis of *Islet*<sup>+</sup> cells in the papilla, we  
465 performed tissue-specific CRISPR knockout using a combination of three validated sgRNAs  
466 spanning most of the coding sequence (**Supplemental Figure 3E**). Because the functionally  
467 important “headpiece” domain is encoded by the last exon, we combined an sgRNA targeting  
468 this exon with two sgRNAs targeting more upstream exons. In *Villin* CRISPR larvae, ACCs were  
469 slightly but significantly shorter in length along the apical-basal axis (**Figure 7F, Supplemental**  
470 **Table 3**). Taken together, these results suggest that *Islet* is required for proper papilla  
471 morphogenesis, possibly through its ability to activate the expression of cytoskeletal effector  
472 genes such as *Villin* during this process.

473

474 **An investigation into the cell and molecular basis of larval settlement metamorphosis**

475 With our different CRISPR knockouts affecting different cell types of the papillae, we asked how  
476 these different perturbations might affect larval metamorphosis. Only the involvement of the PNs  
477 in triggering metamorphosis has been demonstrated (Sakamoto et al., 2022; Wakai et al.,  
478 2021), but it is not yet known how the regulatory networks and cell types of the papillae affect  
479 different processes during metamorphosis. We performed papilla-specific CRISPR as above  
480 using the *Foxc*>*Cas9* vector, targeting the four different transcription factors we have shown to  
481 be involved in patterning the cell types of the papillae: *Pou4*, *Islet*, *Foxg*, and *Sp6/7/8*. We  
482 assayed tail retraction and body rotation at the last stage of metamorphosis (Hotta et al., 2020)  
483 (**Figure 8A,B**), as these are two processes that can be uncoupled in certain genetic  
484 perturbations or naturally occurring mutants (Nakayama-Ishimura et al., 2009).

485 Knockout of *Pou4* recapitulated recent published results on this transcription factor (Sakamoto  
486 et al., 2022). Namely, both tail retraction and body rotation were blocked in the vast majority of  
487 individuals. This suggests that proper specification and/or differentiation of PNs by *Pou4* is  
488 crucial for the ability of the larva to trigger the onset of metamorphosis. In contrast, *Islet*  
489 knockout did not affect tail retraction, but body rotation appeared somewhat impaired. This  
490 suggested that ACCs/ICs are not required for tail retraction, but might play a role in regulating  
491 body rotation downstream of it. Eliminating ACCs using *Islet*>*Sp6/7/8* had no effect on either tail  
492 retraction or body rotation (**Figure 8C**), confirming that ACCs are not required for  
493 metamorphosis, but that perhaps certain *Islet* targets might specifically regulate body rotation.  
494 Unsurprisingly, *Foxg* knockout impaired both tail retraction and body rotation, but also resulted  
495 in a noticeable fraction (~17%) of “tailed juveniles” in which body rotation begins even in the  
496 absence of tail retraction (**Figure 8B,D**). This unusual effect was seen even when repeating the  
497 experiment independently, revealing consistent uncoupling of these two processes upon *Foxg*  
498 knockout (**Supplemental Figure 6**). Finally, *Sp6/7/8* CRISPR did not substantially alter either  
499 tail retraction nor body rotation. Taken together, these results paint a more complex picture of  
500 regulation of metamorphosis by the papillae. Our findings suggest that different cell types of the  
501 papillae might play distinct roles in the regulation of metamorphosis, perhaps interacting with  
502 one another to regulate different steps, or that certain transcription factors might be required for  
503 the expression of key rate-limiting components of these different processes. Further work will be  
504 required to disentangle these different cellular and genetic factors, which we hope will be aided  
505 by our cell type-specific reporters and CRISPR reagents.

506

507 **Discussion**



508 Sensory systems are crucial for interactions between organisms and their environment. The  
509 concentration of sensory functions in the head is thought to have played a central role in  
510 vertebrate evolution, leading to a more active behavior emerging from early filter-feeding  
511 chordate ancestors (Diogo et al., 2015; Gans and Northcutt, 1983; Patthey et al., 2014). The  
512 peripheral components of the sensory systems in vertebrates arise from two physically close but  
513 distinct ectodermal cell populations, the cranial sensory placodes and the neural crest (Martik  
514 and Bronner, 2021). Cranial sensory placodes are characterized by their common ontogenetic  
515 origin from a crescent-shaped region surrounding the anterior neural plate. Our understanding  
516 of the evolutionary origins of structures long presented as vertebrate novelties has benefited  
517 from an increasing number of comparative studies with tunicates. Several discrete populations  
518 of peripheral sensory cells originating from distinct ectodermal regions in tunicates have  
519 respectively been linked to neural crest and cranial placodes, among them the sensory  
520 adhesive papillae (Abitua et al., 2015; Abitua et al., 2012; Horie et al., 2018; Papadogiannis et  
521 al., 2022).

522 Our results have confirmed the existence of molecularly distinct cell types in the *Ciona* papillae,  
523 and the developmental pathways that specify them (summarized in **Figure 9**). Using  
524 CRISPR/Cas9-mediated mutagenesis, we have shown that different transcription factors are  
525 required for their specification, differentiation, and morphogenesis. Namely, ACCs and ICs are  
526 specified from Foxg+/Islet+ cells at the center of each of the three papillae, while OCs and PNs  
527 are specified from interleaved Islet-negative cells that nonetheless derive from initially Foxg+  
528 cells. While Sp6/7/8 specifies IC vs. ACC fate among Islet+ cells, Delta/Notch signaling  
529 suppresses PN fate and promotes OC fate among Islet-negative cells. While there appear to be  
530 two molecularly distinct colocyte subtypes (OCs and ICs), both contain granules that are  
531 stained by PNA, and therefore both are likely to be involved in glue production. Where they  
532 differ might be in the timing of glue production and/or secretion, as they showed distinct  
533 subcellular localization of PNA+ granules, and PNA production was previously shown to start  
534 very early (Zeng et al., 2019b).

535 Our results also demonstrate a clear distinction between CryBG+ ACCs and Pou4+ PNs.  
536 Previously these cell types have been confused and only recently distinguished by TEM and  
537 different molecular markers (Zeng et al., 2019b). Here we show that, while both arise from  
538 Foxc+/Foxg+ cells, ACCs are not specified by Pou4, and PNs are not specified by *Islet*.  
539 However, because *Pou4* can activate *Foxg* expression in a proposed feedback loop (Chacha et

540 al., 2022), overexpression of *Pou4* might result in ectopic activation of ACC markers via ectopic  
541 *Foxg* and *Islet* activation.

542 There are still unanswered questions that we hope future work will address:

543 1) *How do the three “spots” of Foxg+/Islet+ cells form in an invariant manner?* Ephrin-Eph  
544 signaling is often responsible for suppression of FGF/MAPK signaling in alternating cells in  
545 *Ciona* embryos, via asymmetric inheritance/activation of p120 RasGAP (Haupaix et al., 2014;  
546 Haupaix et al., 2013). This is also true in the earlier patterning of the papilla territory, where  
547 EphrinA.d suppresses FGF/MAPK to promote *Foxg* activation (Liu and Satou, 2019). Curiously,  
548 later expression of *EphrinA.d* in the lineage appears to be stronger in medial *Foxg+* cells than in  
549 lateral cells (Liu and Satou, 2019). This distribution would suffice to result in the alternating  
550 ON/OFF pattern of MAPK activation at the tailbud stage that results in the three foci of  
551 *Foxg/Islet* expression. Thus it may be informative to test the ongoing functions of Ephrin-Eph  
552 signaling in this lineage throughout development.

553 2) *How are PNs specified adjacent to the Islet+ cells?* Since Delta/Notch signaling is involved in  
554 PN vs. OC fate, we propose that there is something that biases Notch signaling to be activated  
555 preferentially in those cells not touching the *Islet+* cells. This could be due to cell-autonomous  
556 activation of Notch signaling in the *Islet+* cells, which in turn would allow for suppression of  
557 Notch in adjacent cells fated to become PNs. A recent study showed *Pou4* expansion with  
558 concomitant “U”-shaped expansion of *Islet* when inhibiting BMP signaling (Roure et al., 2022),  
559 while our results with the MEK inhibitor U0126 (based on experiments from Wagner et al. 2011)  
560 suggests the opposite, the elimination of *Pou4+* PNs. Why the discrepancy? One possibility is  
561 that expansion of *Islet* (with or without BMP inhibition) results in specification of supernumerary  
562 RTEN-like neurons from adjacent epidermis, not PNs. While *Pou4* (and other markers, like  
563 *VGluT*) are expressed in all epidermal neurons, our preferred PN marker *KH.C4.78* is not  
564 expressed in RTENs.

565 3) *What activates the expression of Sp6/7/8 in Islet+ cells, ultimately promoting IC specification?*  
566 We do not yet know the exact mitotic history of the ACCs/ICs. How do the initially four *Islet+*  
567 cells divide, and which daughter cells give rise to ACCs vs. ICs? Are ACCs/ICs specified in an  
568 invariant manner, or is there some variability? Finally, what allows the “creeping” activation of  
569 *Sp6/7/8* in the outer ring of cells that likely become the ICs? Is this due to additional asymmetric  
570 FGF/MAPK activation downstream of Ephrin-Eph? Or could this be due to some other signaling

571 pathway? Is there an inductive signal from adjacent cells, for instance PNs or common PN/OC  
572 progenitors?

573 4) *How do the different papilla cell types regulate metamorphosis?* We noticed some uncoupling  
574 of tail resorption and body rotation upon targeting different transcription factors for deletion in  
575 the papillae (**Figure 8**). This was most apparent in the *Foxg* knockout, in which a substantial  
576 portion of individuals displayed the “tailed juvenile” phenotype in which body rotation proceeds  
577 even in the absence of tail resorption. From the *Pou4* knockout, it is clear that PNs are  
578 upstream of both tail resorption and body rotation, but the partial uncoupling seen with the other  
579 manipulations were particularly intriguing. This uncoupling has been reported before in  
580 *Cellulose synthase* mutants, which results in similar tailed juveniles (Sasakura et al., 2005).  
581 Additionally, perturbation of Gonadotropin-releasing hormone (GnRH) or the prohormone  
582 convertase enzyme (PC2) necessary for its processing similarly blocks tail resorption but not  
583 body rotation and further adult organ growth (Hozumi et al., 2020). Thus, it is possible that while  
584 *Pou4* disrupts PN specification altogether, *Foxg* might be more specifically required for GnRH or  
585 other neuropeptide expression/processing in the PNs. Supporting this idea, the *Foxg* CRISPR  
586 did not disrupt PN specification (as assayed by *TGFB>GFP* reporter expression) as robustly as  
587 did *Pou4* CRISPR. Finally, the appearance of juveniles with resorbed tails but no further body  
588 rotation in the *Islet* CRISPR condition suggests a crucial role for ACCs or ICs in metamorphosis  
589 downstream of PNs. Clearly, more work will be required to understand the contributions of  
590 different cell types, and potentially different molecular pathways in the same cell type, towards  
591 either activation or suppression of specific body plan rearrangement processes in tunicate larval  
592 metamorphosis.

593 5) *Are the tunicate larval papillae homologous to vertebrate cement glands?* The papillae have  
594 often been compared to the cement glands of fish and amphibian larvae, which are transient  
595 adhesive organs secreting sticky mucus (Rétaux and Pottin, 2011). Even though they are  
596 innervated by trigeminal fibers, the secreting cells from the cement gland differentiate from a  
597 surface ectoderm region anterior to the oral ectoderm and the panplacodal domain (Pottin et al.,  
598 2010). Therefore, they are usually not considered placodal derivatives. Despite their variability  
599 in size, number, and location, head adhesive organs are proposed to be homologous across  
600 vertebrate species based on their shared expression of *Pitx1/2* and *BMP4* genes, innervation by  
601 trigeminal fibers, and inhibiting mechanism of swimming behavior (Pottin et al., 2010; Rétaux  
602 and Pottin, 2011). While recent papers have revealed an important role for BMP signaling in  
603 patterning the tunicate papilla territory (Liu et al., 2023; Roure et al., 2022), additional work on the

604 molecular basis of the papillary glue in tunicates will be required to answer questions of  
605 homology between these adhesive organs. Our identification of molecular signatures for both  
606 colocyte subtypes in the papillae of *Ciona* provides a starting point for future investigations.

607

## 608 **Acknowledgments**

609 We thank members of the labs at Georgia Tech and Innsbruck, for critical feedback and  
610 support. We thank Susanne Gibboney, Tanner Shearer, Alex Gurgis, Lindsey Cohen, and Akhil  
611 Kulkarni for technical assistance. This work was funded by NSF grant 1940743 and NIH grants  
612 GM143326 and HD104825 to AS; an NSF graduate fellowship to CJJ; and by FWF grant P  
613 35402-B to UR.

614

615

616

617

618

619

620

621

622

623

624

625

626

627

628

629

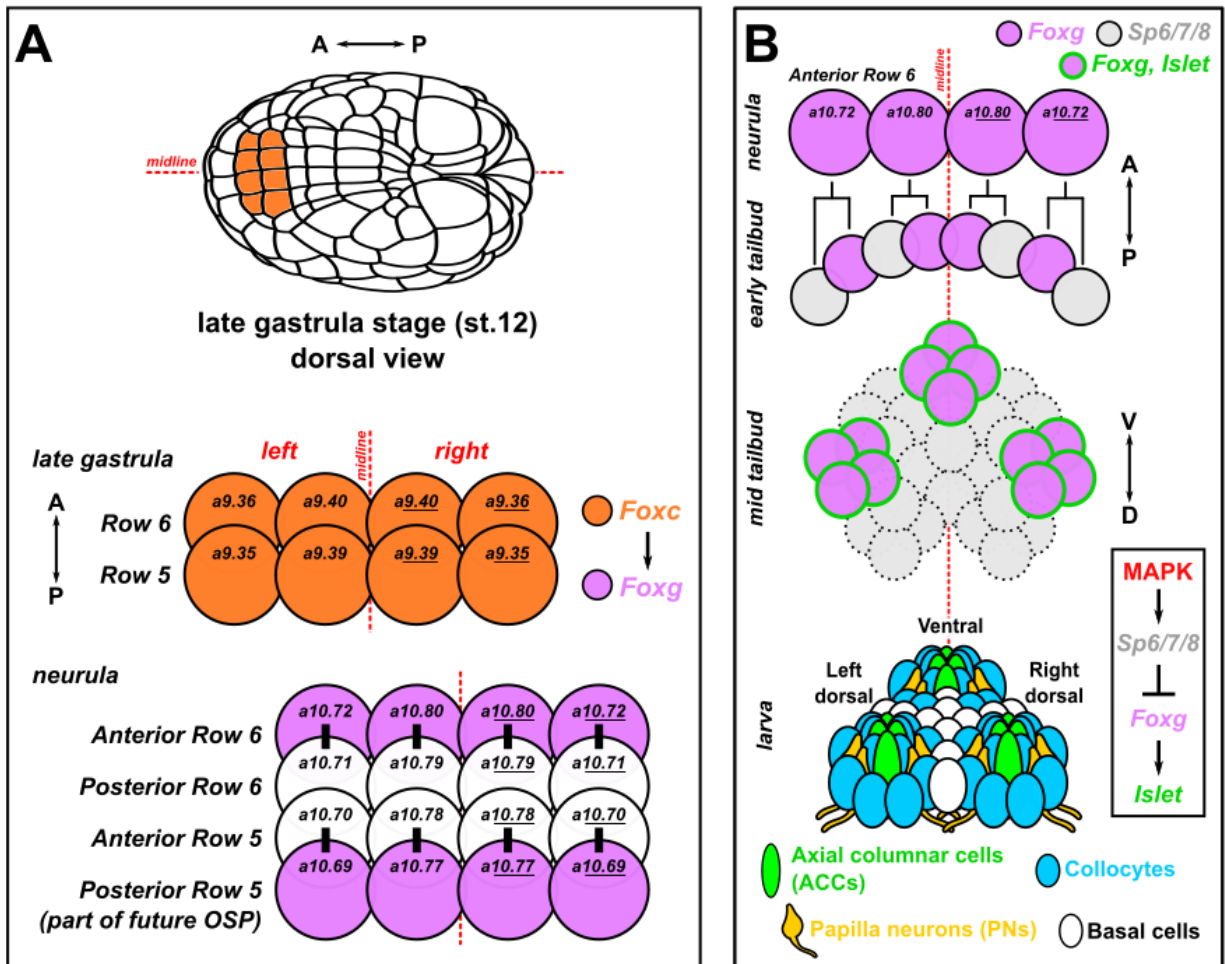

630  
631 Figure 1. Development of the papillae of *Ciona*.

632 A) Diagram showing the early cell lineages that give rise to the papillae. The papillae invariably  
 633 derive from *Foxc*+ cells in the anterior neural plate, more specifically the anterior daughter cells  
 634 of “Row 6” of the neural plate, which activate *Foxg* downstream of *Foxc*. *Foxg* is also activated  
 635 in the posterior daughter cells of “Row 5”, which go on to give rise to part of the oral siphon  
 636 primordium (OSP). Numbers in each cell indicate their invariant identity according to the Conklin  
 637 cell lineage nomenclature. Black bars indicate sibling cells born from the same mother cell. B)  
 638 Diagram of what is currently known about the later lineage and fates of the *Foxg*+ “Anterior Row  
 639 6” cells shown in panel A. As the cells divide mediolaterally, some cells upregulate *Sp6/7/8* and  
 640 downregulate *Foxg* (grey cells). Those cells that maintain *Foxg* expression turn on *Islet* and  
 641 coalesce as three clusters of cells (pink with green outline): one medial, more ventral cluster,  
 642 and two left/right, more dorsal clusters. Later these three clusters organize the territory into the  
 643 three protruding papillae of the larva, which contains several cell types described in detail by  
 644 transmission electron microscopy (Zeng et al. 2019b). Dashed cell outlines indicate uncertain  
 645 number/provenance of cells. A-P: anterior-posterior. D-V: dorsal-ventral. Lineages and gene  
 646 networks are based mostly on Liu and Satou 2019, Nicol and Meinertzhagen 1988, Wagner and  
 647 Levine 2012, and Wagner et al. 2014.

648

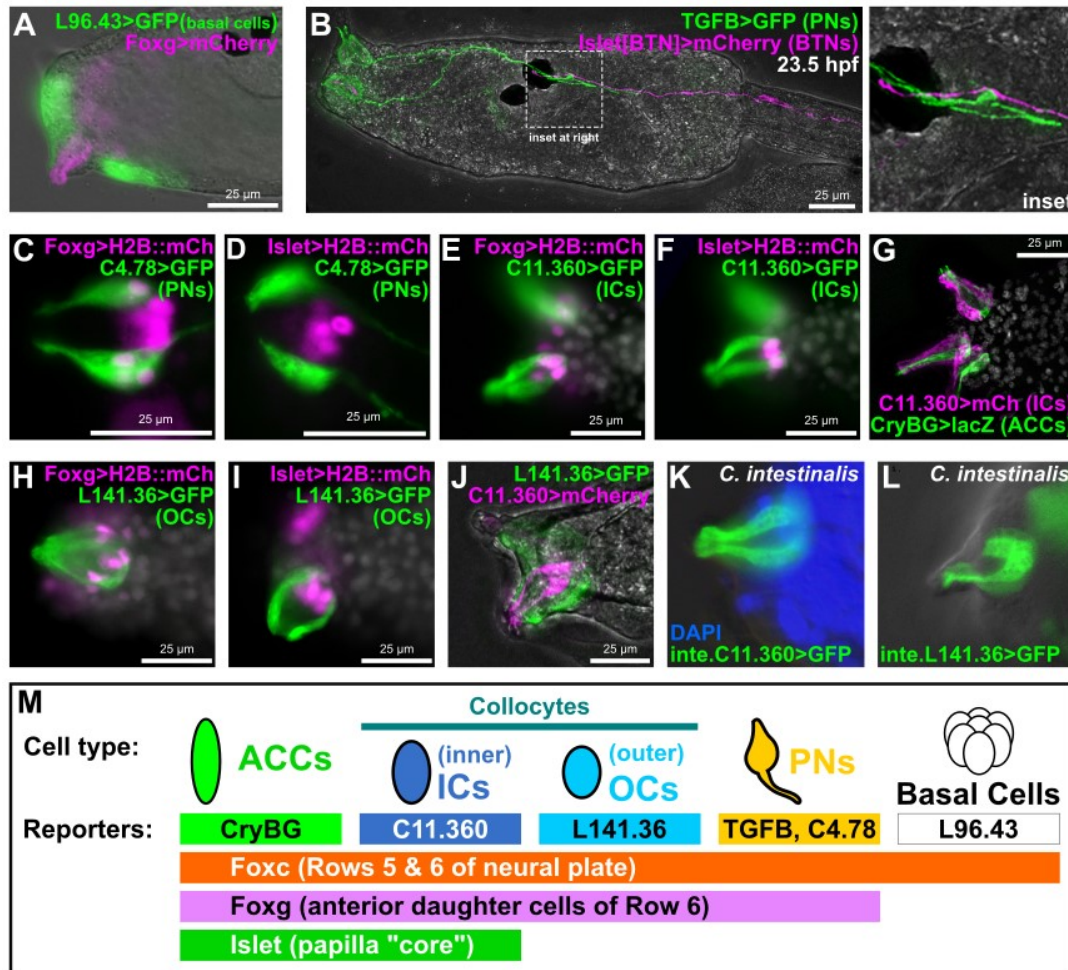

649

650 Figure 2. Novel genetic markers label distinct cell types of the papillae.

651 A) GFP reporter plasmid (green) constructed using the *cis*-regulatory sequences from the *KH.L96.43* gene labels  
652 Basal Cells in between and surrounding the protruding papillae labeled by *Foxg* reporter plasmid (pink). B)  
653 *TGFB>GFP* reporter (green) labels Papilla Neurons (PNs), the axons of which make contacts with Bipolar Tail  
654 Neuron (BTN) axons labeled by a BTN-specific *Islet* reporter (pink), at 23.5 hours post-fertilization (hpf). C) A  
655 *KH.C4.78* reporter (*C4.78>GFP*) also labels PNs, which are also labeled by *Foxg>H2B::mCherry* (*mCh*) reporter  
656 (pink nuclei). D) Lack of overlap between expression of *C4.78>GFP* (green) and a papilla-specific *Islet* reporter  
657 plasmid (pink nuclei) showing that PNs do not arise from *Islet*+ cells. E, F) Co-electroporation of *C11.360>GFP*  
658 (green) with *H2B::mCherry* reporter plasmids (pink nuclei) indicates these cells come from *Foxg*-expressing cells that  
659 also express *Islet*. G) *C11.360>mCherry* reporter (pink) labels centrally-located "inner" collocytes (ICs) adjacent to  
660 Axial Columnar Cells (ACCs) labeled by *CryBG>LacZ* reporter (green). H, I) *L141.36>GFP* reporter (green) labels  
661 "outer" collocytes (OCs) that arise from *Foxg*+ cells (pink nuclei) but do not express *Islet* (pink nuclei). J) ICs and OCs  
662 are distinct cells as there is no overlap between *C11.360* (green) and *L141.36* (pink) reporter plasmid expression. K)  
663 *Ciona intestinalis* (Type B) larva ICs labeled with a reporter plasmid made from the corresponding *cis*-regulatory  
664 sequence of the *C. intestinalis* *Chr11.1038* gene, orthologous to *C. robusta* *KH.C11.360*. L) *C. intestinalis* larva OCs  
665 labeled by a *Chr7.130* reporter, corresponding to the *C. robusta* ortholog *KH.L141.36*. M) Summary of the main  
666 marker genes and corresponding reporter plasmids used in this study to label different subsets of papilla progenitors  
667 and their derivative cell types. All GFP and mCherry reporters fused to the Unc-76 tag, unless specified (see methods  
668 and supplement for details). Weaker *Foxg* -2863/-3 promoter used in panel B, all other *Foxg* reporters used the  
669 improved *Foxg* -2863/+54 sequence instead. All *Islet* reporters shown correspond to the *Islet intron 1 +*  
670 *bpFOG>H2B::mCherry* plasmid. White channel shows either DAPI (nuclei) and/or larva outline in brightfield,  
671 depending on the panel. All *C. robusta* raised at 20°C to 18 hpf except: panel B (23.5 hpf); panels C-F (17 hpf);  
672 panels H-J (20 hpf). *C. intestinalis* raised at 18°C to 20-22 hpf.

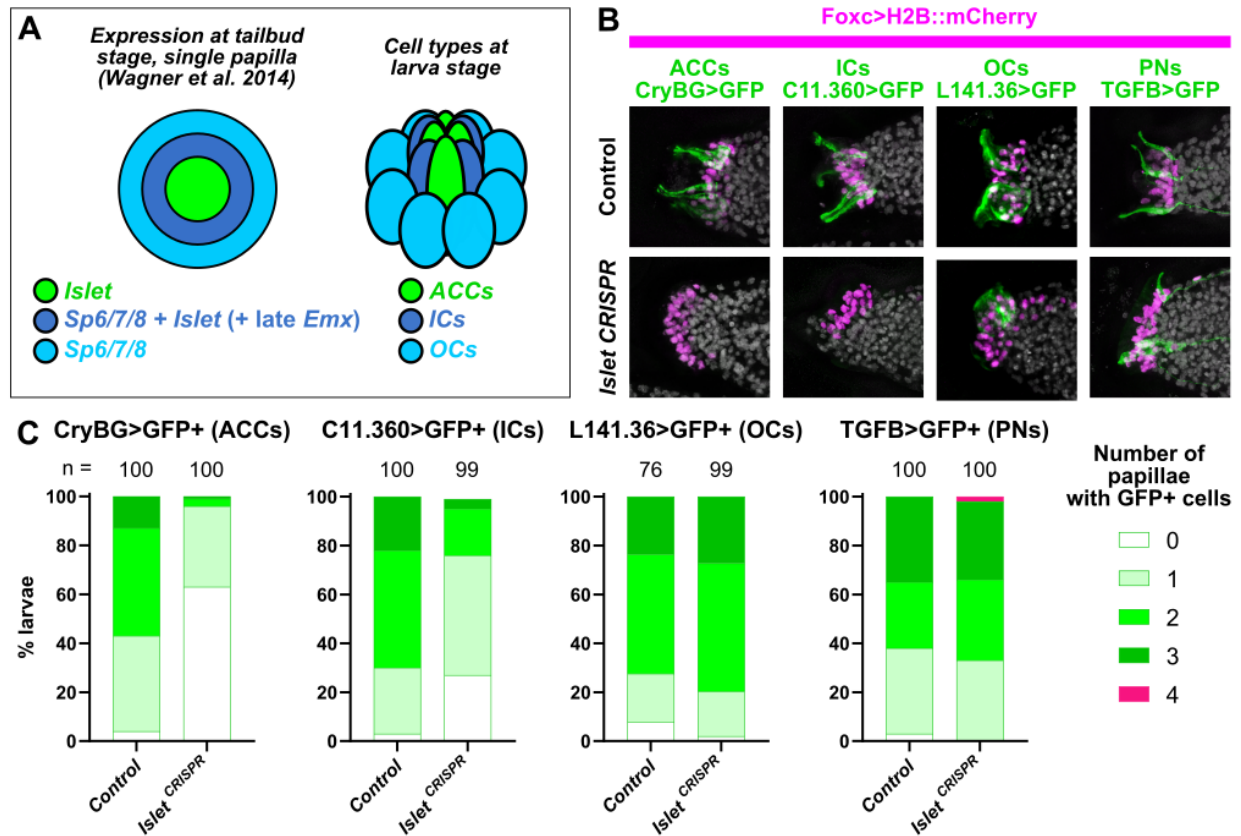

673

674 Figure 3. The transcription factor *Islet* is required for specification of ACCs and ICs.

675 A) Diagram depicting a partially overlapping expression patterns of *Islet* and *Sp6/7/8*, as  
676 originally shown by *in situ* mRNA hybridizations (Wagner et al. 2014), and the correlation of  
677 these patterns with the later arrangement of ACCs, ICs, and OCs in the papillae. “Late” *Emx*  
678 expression in a ring of cells expressing both *Islet* and *Sp6/7/8* appears to be distinct from earlier  
679 *Emx* expression in *Foxg*-negative cells (see text and Supplemental Figure 2 for details). B)  
680 Papilla lineage-specific CRISPR/Cas9-mediated mutagenesis of *Islet* using *Foxc>Cas9* and a  
681 the *U6>Islet.2* single-chain guide RNA (sgRNA) plasmid shows reduction of larvae showing  
682 expression of reporters labeling ACCs and ICs, but not OCs or PNs. Results compared to a  
683 negative “control” condition using a negative control sgRNA (*U6>Control*, see text for details).  
684 Nuclei counterstained with DAPI (white). C) Scoring data for larvae represented in panel B.  
685 *Foxc>H2B::mCherry*+ larvae were scored for quantity of papillae showing visible expression of  
686 the corresponding GFP reporter plasmid. Due to mosaic uptake or retention of the plasmids  
687 after electroporation, number of papillae with GFP fluorescence is variable and rarely seen in all  
688 three papillae even in control larvae. Normally larvae have three papilla (GFP+ or not), but  
689 some mutants have more/fewer than three. ACC/IC/OC sub-panels in panel B at 20 hpf/20°C,  
690 PN sub-panels at 21 hpf/20°C. Same applies to scoring data in Panel C.

691

692

693

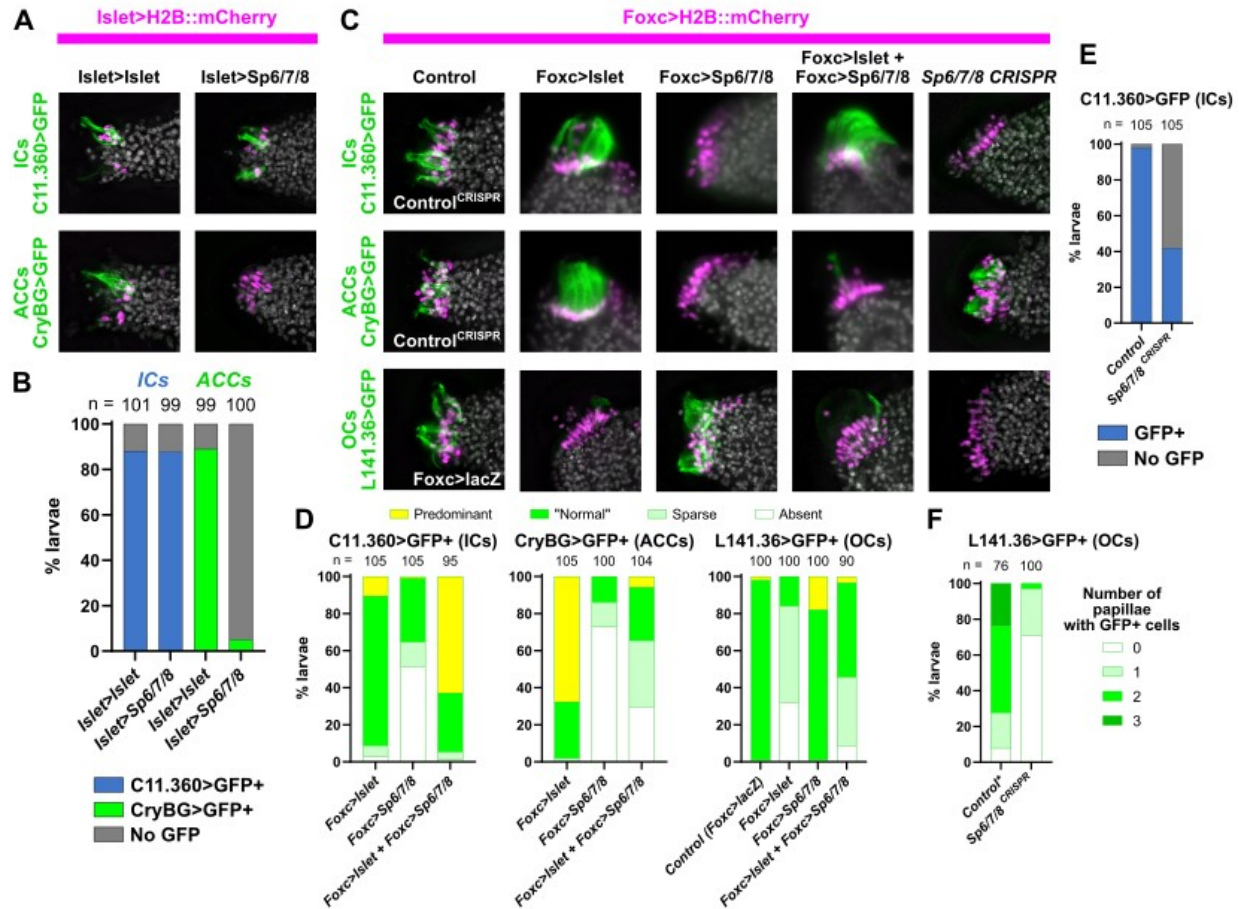

694

695 Figure 4. Specification of ACCs, ICs, and OCs by a combinatorial logic of *Islet* and *Sp6/7/8*.

696 A) Overexpression of *Sp6/7/8* (using the *Islet>Sp6/7/8* plasmid) in all *Islet*+ papilla cells results in loss of  
 697 ACCs (assayed by expression of *CryBG>Unc-76::GFP*, green), but not of ICs (assayed by expression of  
 698 *C11.360>Unc-76::GFP*, green). *Islet* overexpression (with *Islet>Islet*) does not significantly impact the  
 699 specification of ACCs or ICs. Larvae at 20 hpf/20°C. B) Scoring data showing presence or absence of ICs  
 700 or ACCs in the larvae represented in panel A. C) Cell type specification assayed by reporter plasmid  
 701 expression (green) in larvae subjected to various *Islet* and/or *Sp6/7/8* perturbation conditions (see main  
 702 text for details). For ICs and ACCs, the “control” condition is negative control CRISPR (*U6>Control*), while  
 703 for OCs it is *Foxc>lacZ*. Overexpression ACC/IC sub-panels are at 18.5 hpf/20°C, all CRISPR and OC  
 704 panels at 20 hpf/20°C. D) Scoring data for most larvae represented in panel C. *Foxc>H2B::mCherry*+  
 705 larvae were scored for cell type-specific GFP reporter expression that was “normal” (as seen in Wild Type  
 706 larvae normally), “predominant” (ectopic/supernumerary GFP+ cells), “sparse” (reduced  
 707 frequency/intensity of GFP expression), or “absent” (no GFP visible). E) IC reporter (*C11.360>Unc-*  
 708 *76::GFP*) expression scored in *Foxc>H2B::mCherry*+ larvae represented by the top/right-most subpanel  
 709 in panel B. F) OC-specific reporter (*L141.36>Unc-76::GFP*) expression scored in *Foxc>H2B::mCherry*+  
 710 larvae represented by the bottom/right-most subpanel in panel B. Scoring strategy same as in Figure 3.  
 711 Asterisk denotes that the negative control was the same as in Figure 3, as the experiments were  
 712 performed in parallel with the same control sample. *Foxc>Cas9* used for all CRISPR/Cas9 experiments.  
 713 The *Islet* promoter used (panels A-C) was always the *Islet intron 1 + -473/-9* sequence. For  
 714 overexpression conditions, *Foxc>lacZ* or *Islet>LacZ* were used to normalize the total amount of DNA  
 715 introduced (see supplemental sequence file for detailed electroporation recipes).

716



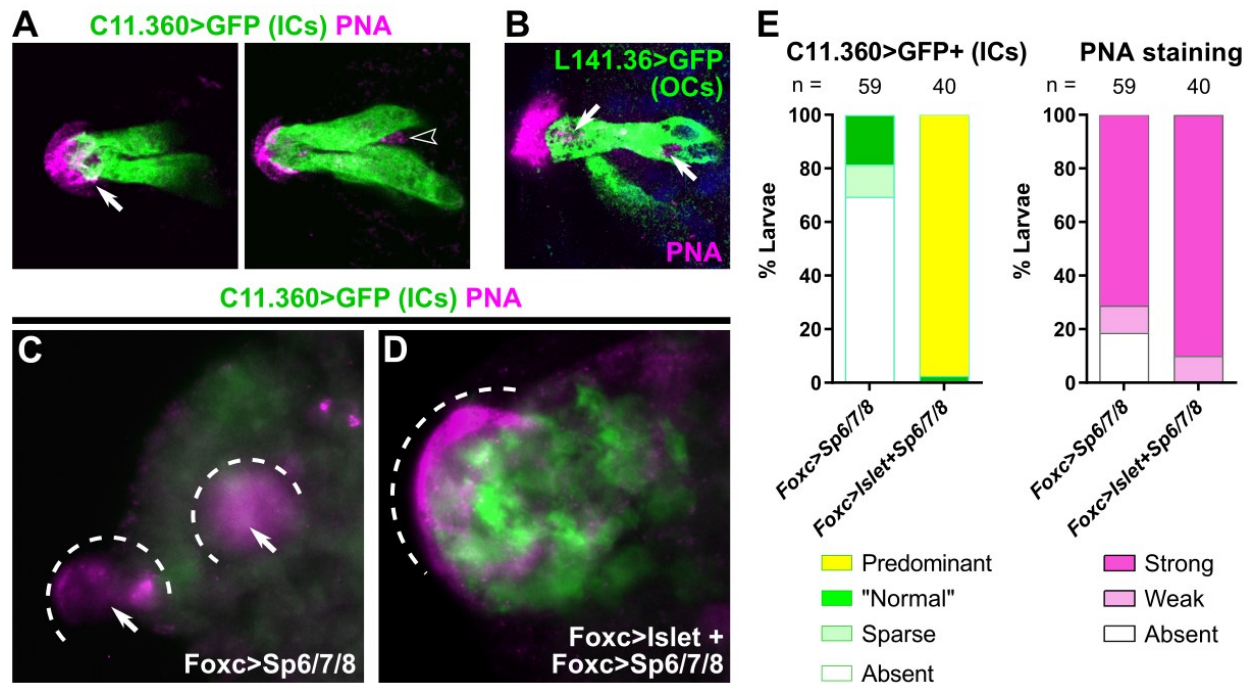

717  
718

Figure 5. Both types of colocytes contribute to production of adhesive material.

719 A) PNA-stained granules (pink) are seen in the hyaline cap and the apical tip of ICs (left panel,  
720 white arrow) in a *C. intestinalis* larva labeled by the *C. intestinalis* C11.360>Unc-76::GFP  
721 reporter (green). PNA-stained granules are also seen in cells not labeled by the IC reporter  
722 (right subpanel, hollow arrowhead), suggesting they are localized in a different cell type. Left  
723 and right subpanels are from different focal planes of the same papilla. B) OCs labeled with *C.*  
724 *robusta* L141.36>Unc-76::GFP (green) in a *C. robusta* larva, with PNA-stained granules (pink)  
725 in both apical and basal positions within the cell (white arrows). See **Supplemental Movies** for  
726 full confocal stacks. DAPI in blue. C) PNA staining (pink) in *C. robusta* upon overexpression of  
727 *Sp6/7/8* alone, showing reduction of IC specification as assayed by C11.360>Unc-76::GFP  
728 expression (green). PNA staining is still visible in papillae (white arrows, dashed outlines),  
729 suggesting that ICs are not the only cell type involved in adhesive glue formation. D) PNA  
730 staining (pink) and C11.360>Unc-76::GFP expression (green) in *C. robusta* upon  
731 overexpression of both *Islet* and *Sp6/7/8*, showing expansion of IC fate in a single large papilla  
732 (dashed outline). PNA staining is similarly expanded over the entire IC cluster, confirming that  
733 ICs produce the adhesive glue. E) Scoring larvae represented in panels C and D. PNA staining  
734 is observed despite loss of IC fate or expansion of supernumerary ICs, confirming that this cell  
735 type is one of the contributors of PNA-positive adhesive glue. *C. intestinalis* raised to 20-22 hpf  
736 at 18°C, *C. robusta* raised to 20 hpf at 20°C.

737

738

739

740

741

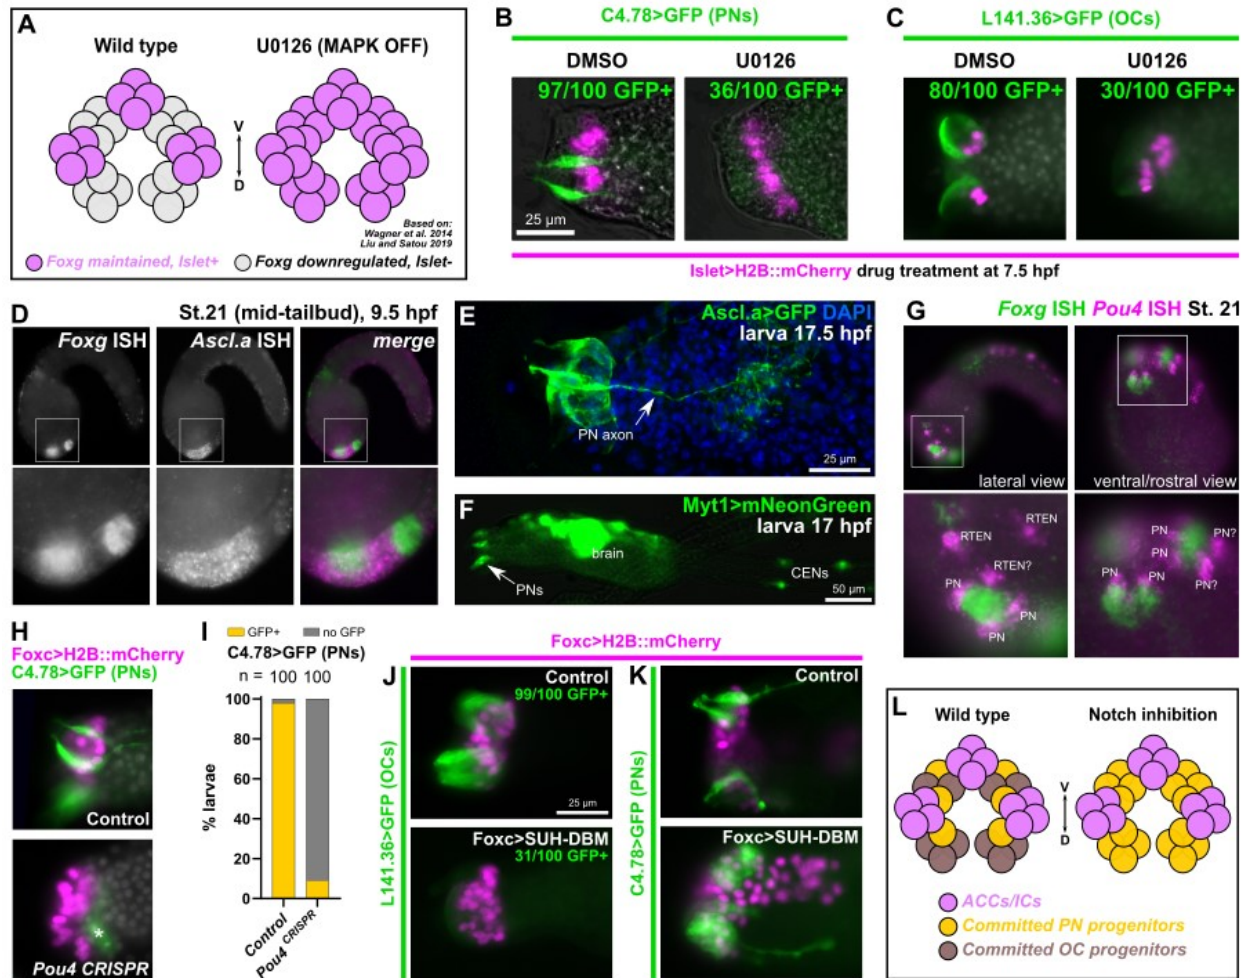

742

743 Figure 6. Specification of PNs and OCs from *Islet*-negative cells by MAPK and Notch pathways.

744 A) Diagram showing effect of MAPK inhibition with the pharmacological MEK inhibitor U0126, based on  
745 findings from Wagner et al. 2014 and Liu and Satou 2019. Inhibition of FGF/MAPK results in expansion of  
746 *Foxg* and *Islet* from three discrete foci to a large “U-shaped” swath, transforming three papillae into a  
747 single, enlarged papilla (similar results reported with BMP inhibition by Roure et al. 2022). B) U0126  
748 treatment at 7.5 hpf/20°C results in loss of PNs (assayed by *C4.78>Unc-76::GFP*, green) upon expansion  
749 of *Islet*+ cells (pink nuclei), relative to DMSO alone. C) The same treatment results in loss of OCs  
750 (*L141.36>Unc-76::GFP*, green) upon expansion of *Islet*+ cells (pink nuclei). All larvae in B,C at 17  
751 hpf/20°C. D) Two-color, whole-mount mRNA *in situ* hybridization for *Foxg* (green in merged image) and  
752 *Ascl.a* (*KH. L9.13*, pink). E) Larva electroporated with *Ascl.a>Unc-76::GFP* labeling several papilla cells  
753 including PNs. F) *Myt1>mNeonGreen* labeling PNs and other neurons including Caudal Epidermal  
754 Neurons (CENs). G) Two-color *in situ* hybridization of *Foxg* (green) and *Pou4* (pink), the latter labeling  
755 adjacent PNs and possibly Rostral Trunk Epidermal Neurons (RTENs). H) Lineage-specific  
756 CRISPR/Cas9-mediated mutagenesis of *Pou4* results in loss of PN reporter expression (*C4.78>Unc-*  
757 *76::GFP*, green). Larvae at 17 hpf/20°C. I) Scoring of *Foxc>H2B::mCherry*+ larvae represented in panel  
758 H. J) Inhibition of Delta/Notch signaling using *Foxc>SUH-DBM* results in reduced expression of OC  
759 reporter (*L141.36>Unc-76::GFP*, green) at 21 hpf/20°C and K) concomitant expansion of supernumerary  
760 PNs at 17 hpf/20°C (labeled by *C4.78>Unc-76::GFP*, green) relative to *Foxc>lacZ* control. L) Summary  
761 diagram and model of effects of Delta/Notch inhibition on PN/OC fate choice in *Islet*-negative (but  
762 formerly *Foxg*+) papilla progenitor cells. All *Islet* reporters are the *Islet intron 1 + bpFOG>H2B::mCherry*.

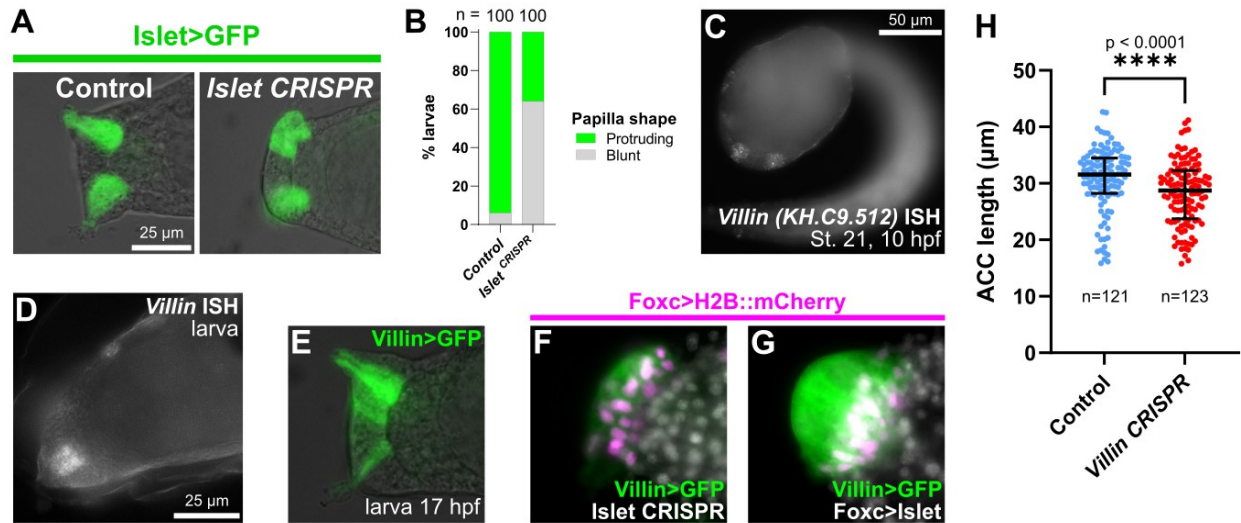

763

764 Figure 7. *Islet* is also required for papilla morphogenesis and regulates expression of the  
765 cytoskeletal effector Villin

766 A) Papilla shape is blunt at the apical end upon tissue-specific CRISPR/Cas9-mediated  
767 mutagenesis of *Islet*. Embryos were electroporated with *Islet* intron 1 + -473/-9>*Unc-76::GFP*  
768 and *Foxc*>*Cas9*. *Islet* CRISPR was performed using *U6>Islet.2* sgRNA plasmid, and the  
769 negative control used *U6>Control*. Larvae were imaged at 20 hpf/20°C. B) Scoring of  
770 percentage of GFP+ larvae classified as having normal “protruding” or blunt papillae, as  
771 represented in panel A. C) *In situ* mRNA hybridization of *Villin*, showing expression in  
772 *Foxg*+/*Islet*+ central papilla cells at 10 hpf/20°C (stage 21) and D) at the larva stage. E) *Villin* -  
773 *721/-1>Unc-76::GFP* showing expression in the papilla territory, strongest in the central cells. F)  
774 *Villin* -*721/-1>Unc-76::GFP* is downregulated by tissue-specific CRISPR/Cas9 mutagenesis of  
775 *Islet* (*Foxc*>*Cas9* + *U6>Islet.1* + *U6>Islet.2*, see text for details) and G) upregulated by  
776 overexpressing *Islet* (*Foxc*>*Islet*, see text for details). F and G panels both at 17 hpf/20°C. H)  
777 Quantification of ACC lengths measured in negative control and papilla-specific *Villin* CRISPR  
778 larvae at 17 hpf/20°C. Large bars indicate medians, smaller bars indicate interquartile ranges.  
779 P-value denotes one-tailed Mann-Whitney test. Raw measurements available in **Supplemental**  
780 **Table 3**.

781

782

783

784

785

786

787

788

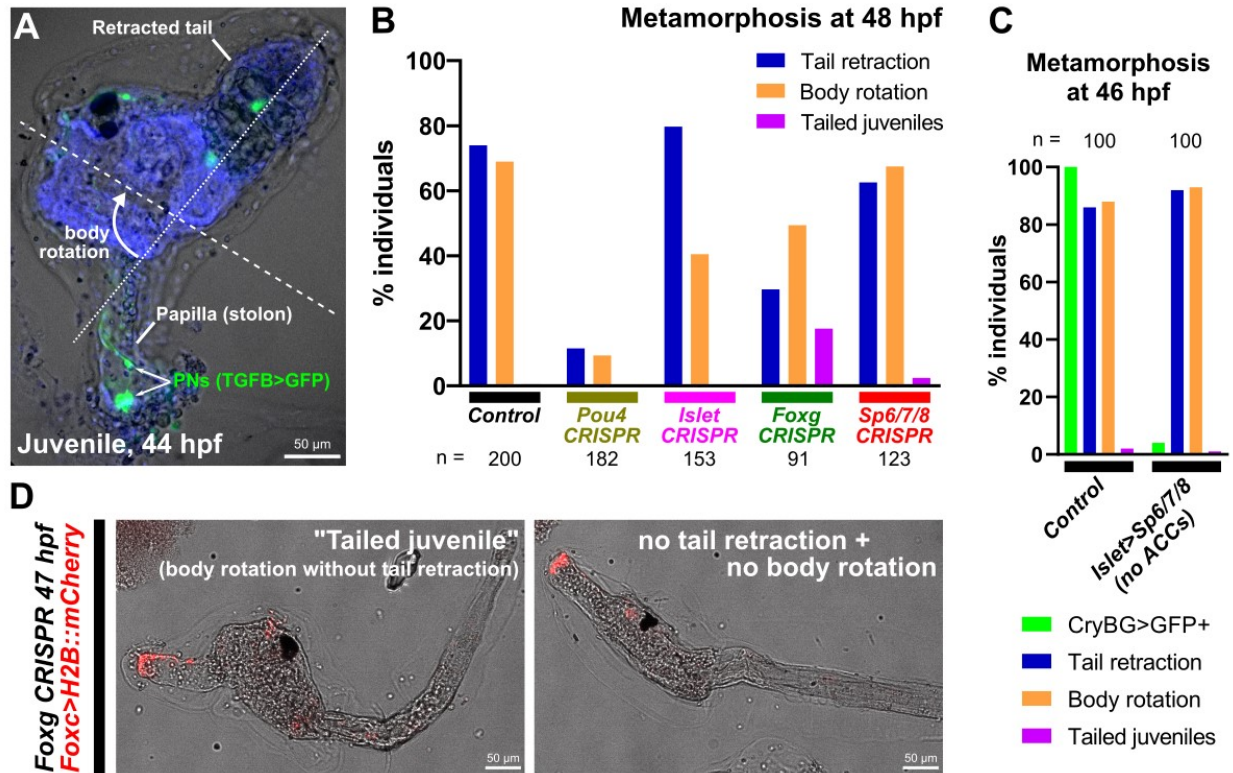

789

790 Figure 8. Genetic perturbations of metamorphosis.

791 A) *Ciona robusta* juvenile undergoing metamorphosis, showing the retracted tail and rotated  
 792 anterior-posterior body axis (dashed lines). Papilla Neurons (PNs) in the former papilla (now  
 793 substrate attachment stolon, or holdfast) labeled by *TGFB>Unc-76::GFP* (green). Animal  
 794 counterstained with DAPI (blue). B) Scoring of total individuals showing tail retraction and/or  
 795 body rotation at 48 hpf/20°C in various papilla territory-specific (using *Foxc>Cas9*) CRISPR-  
 796 based gene knockouts. "Tailed juveniles" have undergone body rotation but not tail retraction,  
 797 whereas normally body rotation follows tail retraction. The sgRNA plasmids used for each  
 798 condition were as follows- Control: *U6>Control*; *Pou4*: *U6>Pou4.3.21* + *U6>Pou4.4.106*; *Islet*:  
 799 *U6>Islet.2*; *Foxg*: *U6>Foxg.1.116* + *U6>Foxg.5.419*; *Sp6/7/8*: *U6>Sp6/7/8.4.29* +  
 800 *U6>Sp6/7/8.8.117*. C) Plot showing lack of any discernable metamorphosis defect after  
 801 eliminating ACCs using *Islet intron 1* + *bpFOG>Sp6/7/8* (images not shown). Only *Islet intron 1*  
 802 + *bpFOG>H2B::mCherry*+ individuals were scored. ACC specification was scored using the  
 803 *CryBG>Unc-76::GFP* reporter. D) Example of "tailed juveniles" at 47 hpf/20°C compared to a  
 804 larva in which no tail retraction or body rotation has occurred, elicited by tissue-specific *Foxg*  
 805 CRISPR (*Foxc>Cas9* + *U6>Foxg.1.116* + *U6>Foxg5.419*). See Supplemental Figure 6 for  
 806 scoring.

807

808

809

810

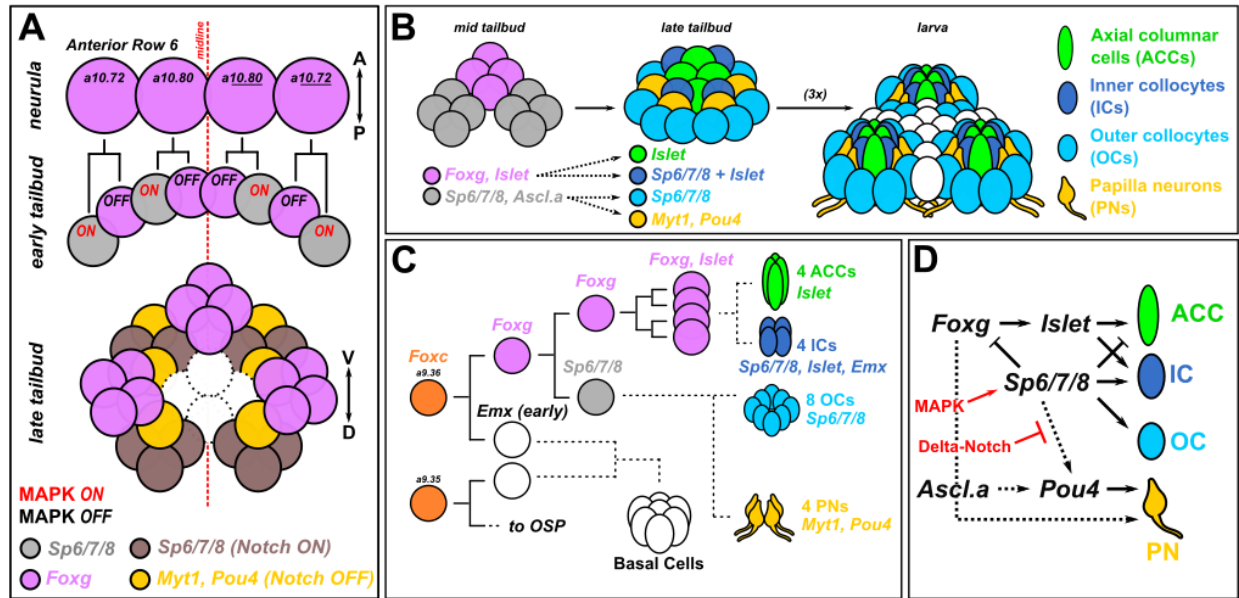

811

812 Figure 9. Summary diagram.

813 A) Updated diagram of the development of the anterior descendants of Row 6 in the neural  
 814 plate to show the proposed patterns of MAPK and Delta/Notch signaling that set up the three  
 815 *Foxg*<sup>+</sup> clusters and interleaved *Foxg*<sup>-</sup> neurogenic cells. B) Diagram proposing the  
 816 contributions of *Foxg*<sup>+</sup> and *Foxg*<sup>-</sup> cells to later patterns of transcription factors that  
 817 specify the different cell types found in each papilla, which is in turn is repeated three times,  
 818 thanks to the process shown in panel A. C) Papilla development shown as cell lineages, with  
 819 dashed lines indicating uncertain cell divisions and lineage history. Cell type numbers based on  
 820 Zeng et al. 2019b. D) Provisional gene regulatory network diagram of the signaling pathways  
 821 and transcription factors involved in specification and differentiation of the different papilla cell  
 822 types. Arrowheads indicate activating gene expression or promoting cell fate, while blunt ends  
 823 indicate repression of gene expression of cell fate. Solid lines indicate regulatory links (direct or  
 824 indirect) that are supported by the current data and literature. Dashed lines indicate regulatory  
 825 links that have not been tested, or need to be investigated in more detail. OSP: oral siphon  
 826 primordium. A-P: anterior-posterior. D-V: dorsal-ventral.

827

828

829

830

831

832

833

834

835

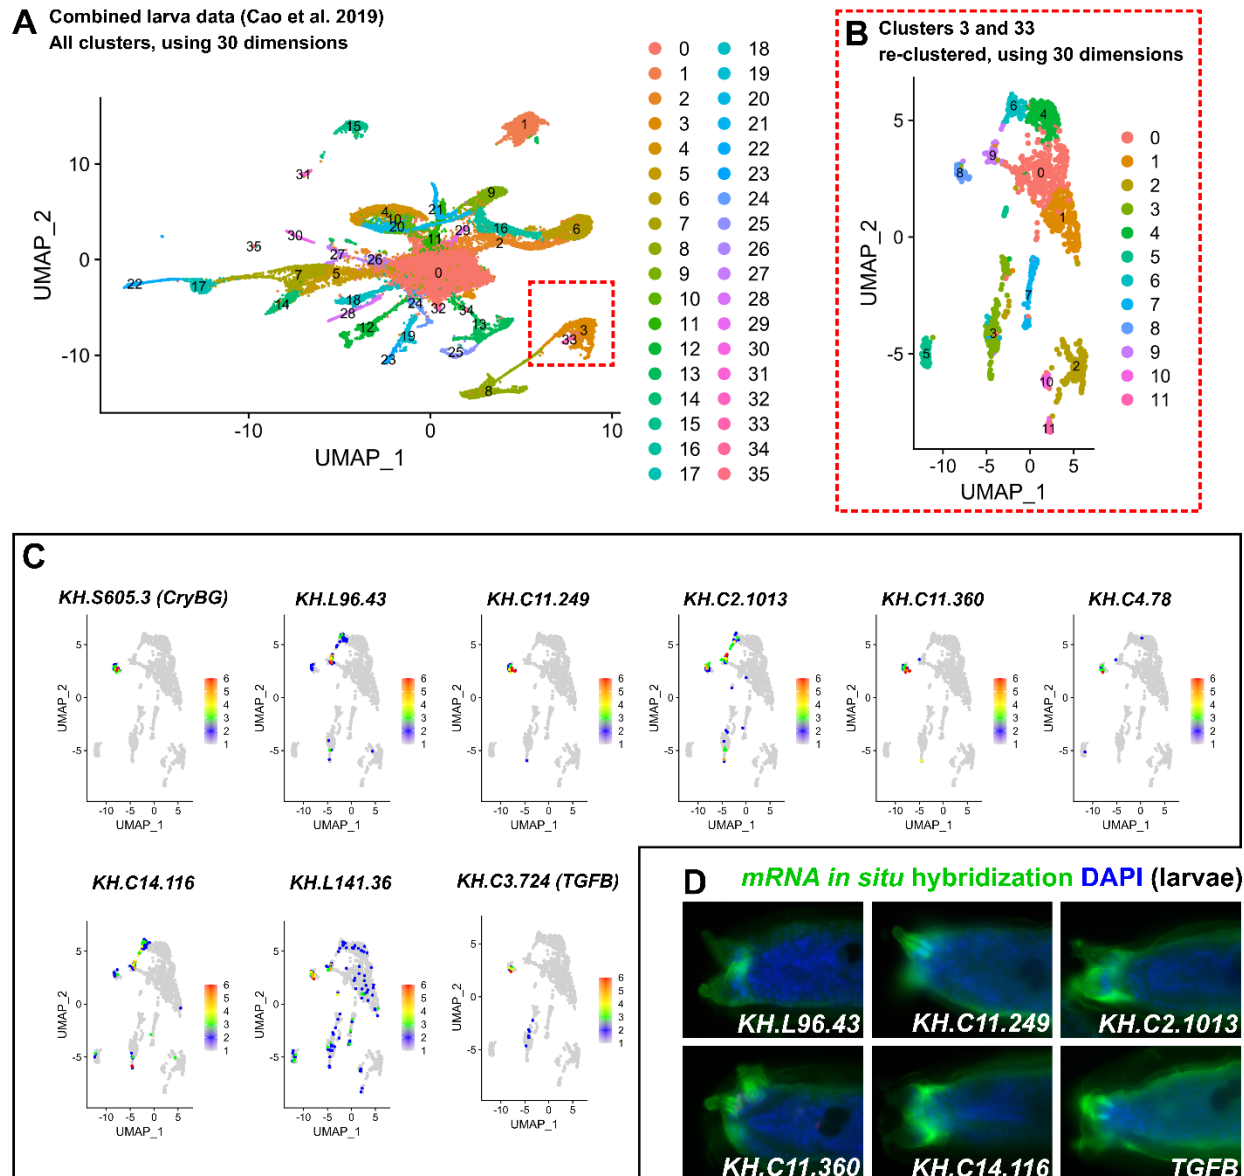

836  
837

Supplemental Figure 1. Finding papilla cell type-specific markers in single-cell RNAseq data.

838 A) Cell clusters based from reanalysis and re-clustering of whole-larva single-cell RNA  
839 sequencing (scRNAseq) data from Cao et al. 2019. Dashed red box indicated clusters 3 and 33,  
840 which appeared to correspond to several papilla cell types. B) Cells from clusters 3 and 33 from  
841 plot A set aside and re-clustered. C) Differential expression plots showing examples of  
842 candidate papilla cell type marker genes mapped onto clusters in B. D) Fluorescent, whole-  
843 mount *in situ* mRNA hybridization (green) for certain genes plotted in C, labeling different cells  
844 in the papillae of *Ciona robusta* (*intestinalis* Type A) hatched larvae. Unless specifically named,  
845 genes are indicated by KyotoHoya (KH) ID numbers (e.g. *KH.L96.43*). All larvae were fixed at  
846 18 hours post-fertilization (hpf), 20°C, except for *C11.360* and *C2.1013* (18.5 hpf). Blue  
847 counterstain is DAPI.

848

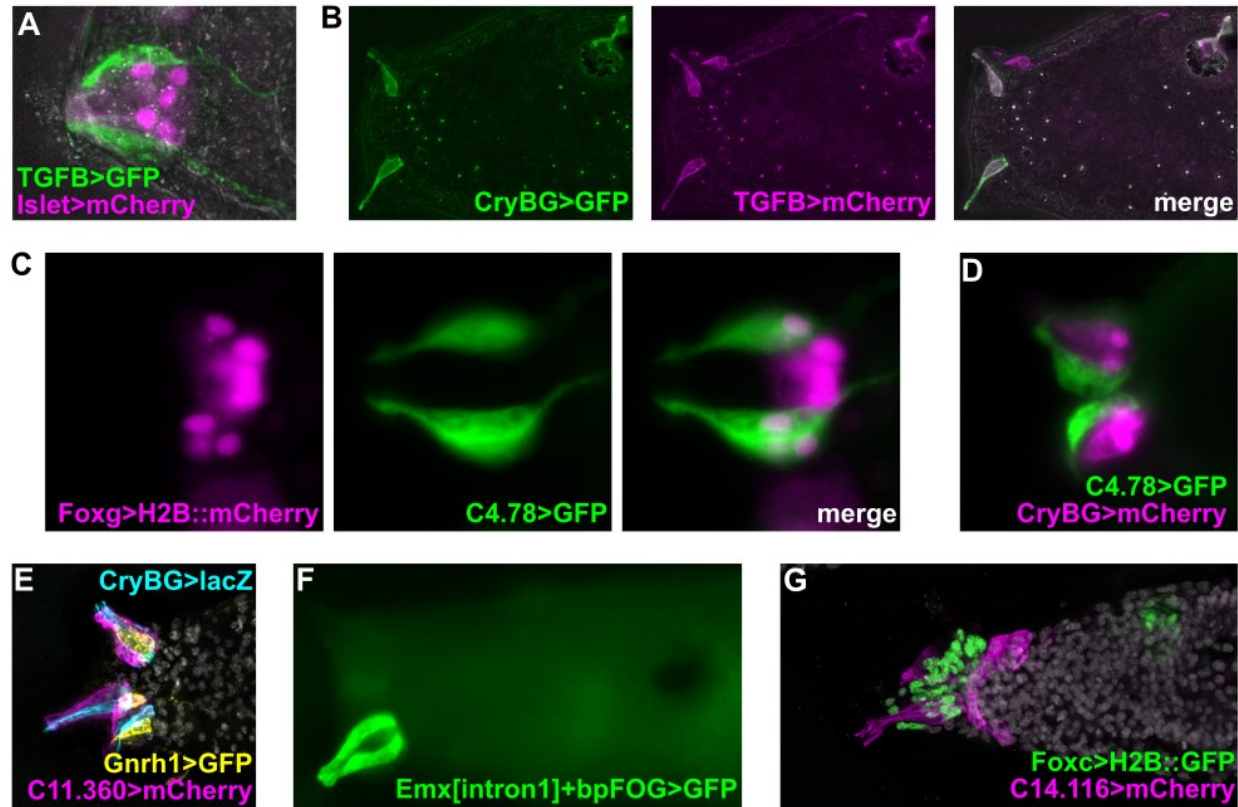

849

850 Supplemental Figure 2. Additional marker genes and reporter plasmids expressed in papillae.

851 A) *TGFB>Unc-76::GFP* reporter (green) is not co-expressed in the same cells as the *Islet intron 1 + -473/-*  
 852 *9>mCherry* reporter (pink). B) Cross-talk between *CryBG>Unc-76::GFP* and *TGFB>Unc-76::mCherry*  
 853 reporter plasmids, showing aberrant co-expression in ACCs and/or PNs only when co-electroporated. C)  
 854 Double electroporation showing that *Foxg>H2B::mCherry* (pink nuclei) is expressed in PNs labeled by  
 855 *C4.78>Unc-76::GFP* reporter (green). D) Mutually exclusive expression of *C4.78>Unc-76::GFP* in PNs  
 856 (green) and *CryBG>mCherry* in ACCs (pink). E) Mutually exclusive expression of *CryBG>lacZ* in ACCs  
 857 (cyan), *Gnrh1>Unc-76::GFP* in PNs (yellow), and *C11.360>Unc-76::mCherry* in ICs (magenta), with DAPI  
 858 counterstained in grey. This larva is the same as in main Figure 2G, with an additional channel and  
 859 different false coloring. F) Reporter plasmid containing the 1<sup>st</sup> intronic region of *Emx* drives expression in  
 860 ICs, likely corresponding to the “ring” of late *Emx* expression in *Islet+* cells reported in Wagner et al. 2014  
 861 and distinct from earlier *Emx* expression in the papilla lineage as described in Liu and Satou 2019. G)  
 862 *C14.116>Unc-76::mCherry* reporter expressed in central cells (ACCs+ICs, pink) and Basal Cells around  
 863 the three papillae. DAPI in grey.

864

865

866

867

868

869

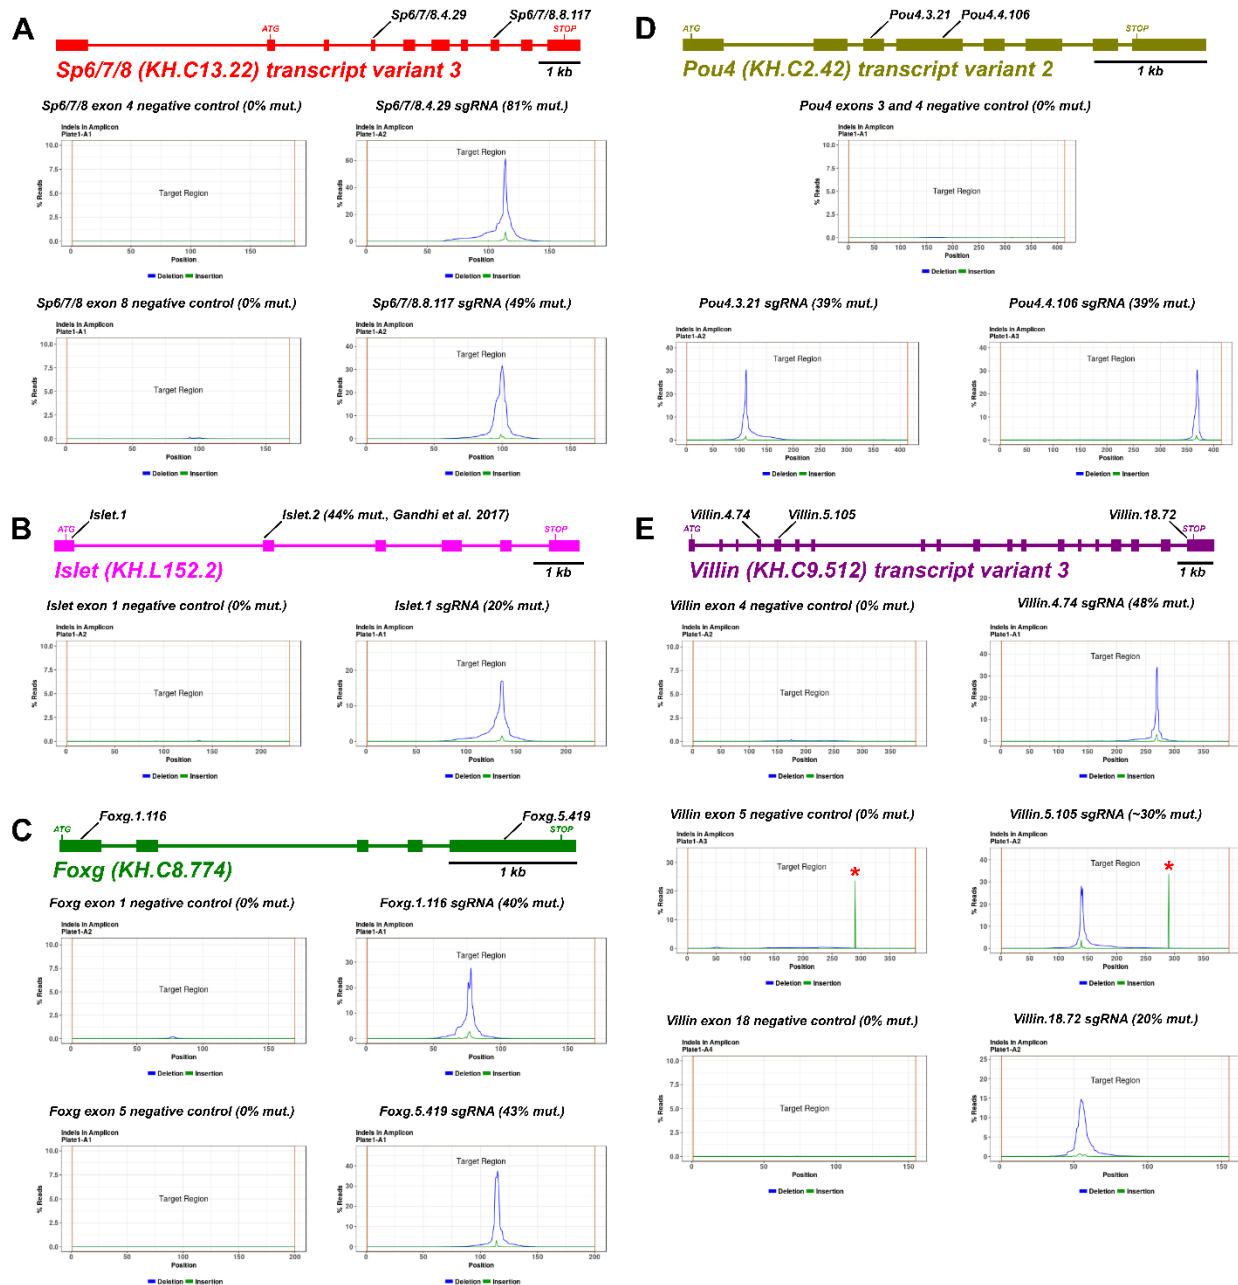

870

871 Supplemental Figure 3. Validation of sgRNAs for CRISPR/Cas9-mediated mutagenesis.

872 Gene loci diagrams for the four transcription factor-encoding genes investigated in this study:  
 873 *Sp6/7/8*, *Foxg*, *Islet*, and *Pou4*. Plots underneath each gene show validation by Illumina  
 874 sequencing (“Next-generation sequencing”, or NGS) of amplicons, performed as “Amplicon-EZ”  
 875 service by Azenta. Mutagenesis efficacies are calculated by this service, and histograms of  
 876 mapped reads show specificity of indels elicited by each sgRNA. Negative control amplicons are  
 877 amplified from samples that were electroporated with no sgRNA, *U6>Control* sgRNA, or  
 878 sgRNAs targeting unrelated amplicon regions. Note different y axis scales for each plot.  
 879 Asterisks in *Villin* exon 5 amplicon plot indicate naturally occurring indel. Precise calculation of  
 880 mutagenesis efficacy for *Villin.5.105* sgRNA was not given due to this natural indel.



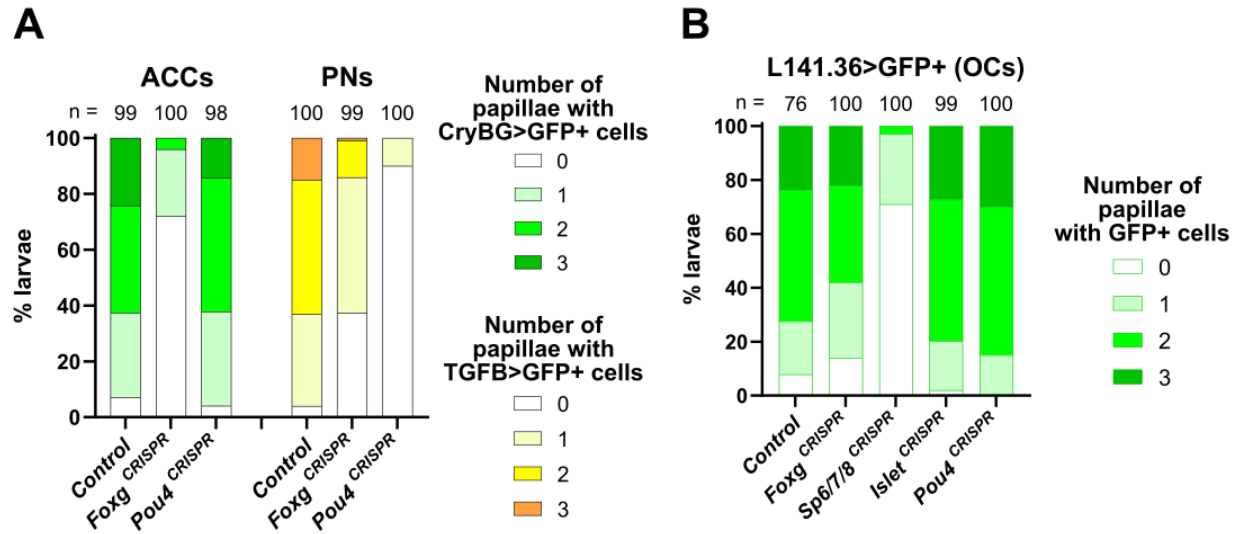

881

882 Supplemental Figure 4. Effect of various CRISPR knockouts on specification of ACCs, PNs, and  
883 OCs.

884 A) Scoring of effect of papilla-specific CRISPR knockout of *Foxg* or *Pou4* on specification of  
885 ACCs and PNs. Embryos were electroporated with *Foxc>H2B::mCherry*, *Foxc>Cas9*,  
886 *CryBG>Unc-76::GFP* (ACC reporter) or *TGFB>Unc-76::GFP* (PN reporter), and gene-specific  
887 sgRNA combinations (see below for specific combinations). B) Scoring of effects of papilla-  
888 specific CRISPR knockouts on OC specification as assayed by *L141.36>Unc-76::GFP* reporter.  
889 All were performed in parallel, but some are represented in Figure 4 also. For all plots, only  
890 larvae showing *Foxc>H2B::mCherry* expression in the papillae were scored. Specific sgRNAs  
891 used: *Foxg*: *U6>Foxg.1.116 + U6>Foxg.5.419*; *Pou4*: *U6>Pou4.3.21 + U6>Pou4.4.106*;  
892 *Sp6/7/8*: *U6>Sp6/7/8.4.29 + U6>Sp6/7/8.8.117*; *Islet*: *U6>Islet.2*; *Control*: *U6>Control*.

893

894

895

896

897

898

899

900

901

902

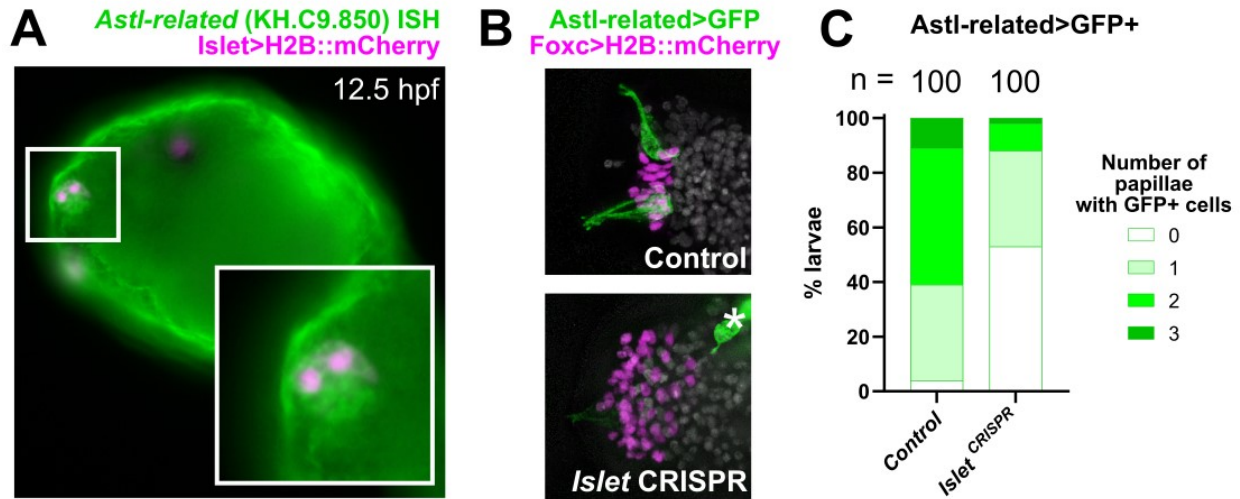

903

904 Supplemental Figure 5. Validation of *Astl-related*, a transcriptional target of *Islet* confirmed by  
905 RNAseq.

906 A) *In situ* mRNA hybridization (ISH) showing expression of *Astl-related* (green) specifically in the  
907 *Islet*+ cells of the papillae (labeled by *Islet intron 1 + -473/-9*>*mCherry*, pink nuclei) B) Tissue-  
908 specific CRISPR/Cas-mediated mutagenesis of *Islet* results in loss of *Astl-related*>*Unc-76::GFP*  
909 reporter expression in ACCs/ICs (green). *Foxc*>*Cas9* was used to restrict CRISPR/Cas9 to the  
910 papilla territory (labeled by *Foxc*>*H2B::mCherry*, pink nuclei). Asterisk denotes residual reporter  
911 expression in cells outside the papilla territory. C) Scoring of larvae represented in panel B,  
912 following criteria used for Figure 3.

913

914

915

916

917

918

919

920

921

922

923

924

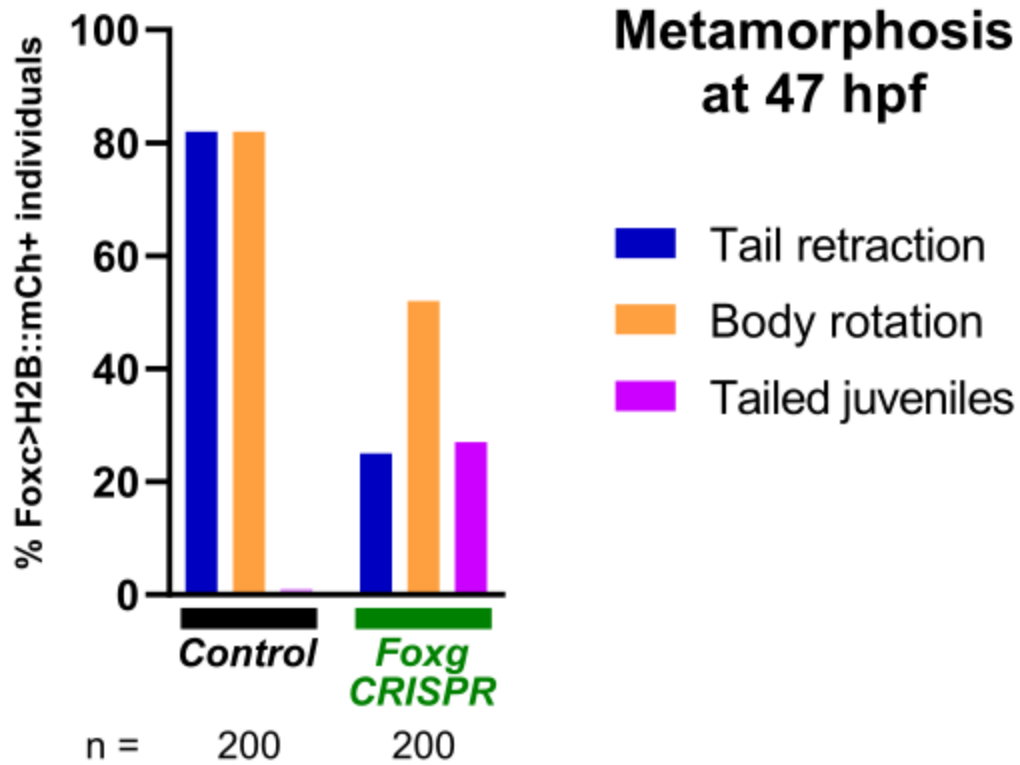

925

926 Supplemental Figure 6. Replicate of *Foxg* CRISPR effects on metamorphosis.

927 Scoring of individuals represented in Figure 7D. See supplemental sequence file for detailed  
928 plasmid electroporation recipes.

929

930

931

932

933

934

935

936

937

938

939

940 **REFERENCES**

- 941 Abitua, P.B., Gainous, T.B., Kaczmarczyk, A.N., Winchell, C.J., Hudson, C., Kamata, K., Nakagawa, M.,  
942 Tsuda, M., Kusakabe, T.G., Levine, M., 2015. The pre-vertebrate origins of neurogenic placodes. *Nature*.  
943 Abitua, P.B., Wagner, E., Navarrete, I.A., Levine, M., 2012. Identification of a rudimentary neural crest in  
944 a non-vertebrate chordate. *Nature* 492, 104.
- 945 Afgan, E., Nekrutenko, A., Grüning, B.A., Blankenberg, D., Goecks, J., Schatz, M.C., Ostrovsky, A.E.,  
946 Mahmoud, A., Lonie, A.J., Syme, A., 2022. The Galaxy platform for accessible, reproducible and  
947 collaborative biomedical analyses: 2022 update. *Nucleic acids research*.
- 948 Beh, J., Shi, W., Levine, M., Davidson, B., Christiaen, L., 2007. FoxF is essential for FGF-induced migration  
949 of heart progenitor cells in the ascidian *Ciona intestinalis*. *Development* 134, 3297-3305.
- 950 Caicci, F., Zaniolo, G., Burighel, P., Degasperi, V., Gasparini, F., Manni, L., 2010. Differentiation of papillae  
951 and rostral sensory neurons in the larva of the ascidian *Botryllus schlosseri* (Tunicata). *Journal of*  
952 *Comparative Neurology* 518, 547-566.
- 953 Cao, C., Lemaire, L.A., Wang, W., Yoon, P.H., Choi, Y.A., Parsons, L.R., Matese, J.C., Levine, M., Chen, K.,  
954 2019. Comprehensive single-cell transcriptome lineages of a proto-vertebrate. *Nature* 571, 349-354.
- 955 Chacha, P.P., Horie, R., Kusakabe, T.G., Sasakura, Y., Singh, M., Horie, T., Levine, M., 2022. Neuronal  
956 identities derived by misexpression of the POU IV sensory determinant in a protovertebrate.  
957 *Proceedings of the National Academy of Sciences* 119, e2118817119.
- 958 Chen, J.S., Pedro, M.S., Zeller, R.W., 2011. miR-124 function during *Ciona intestinalis* neuronal  
959 development includes extensive interaction with the Notch signaling pathway. *Development* 138, 4943-  
960 4953.
- 961 Christiaen, L., Wagner, E., Shi, W., Levine, M., 2009a. Electroporation of transgenic DNAs in the sea  
962 squirt *Ciona*. *Cold Spring Harbor Protocols* 2009, pdb. prot5345.
- 963 Christiaen, L., Wagner, E., Shi, W., Levine, M., 2009b. Isolation of sea squirt (*Ciona*) gametes,  
964 fertilization, dechoriation, and development. *Cold Spring Harbor Protocols* 2009, pdb. prot5344.
- 965 DeBiasse, M.B., Colgan, W.N., Harris, L., Davidson, B., Ryan, J.F., 2020. Inferring tunicate relationships  
966 and the evolution of the tunicate Hox cluster with the genome of *Corella inflata*. *Genome Biology and*  
967 *Evolution* 12, 948-964.
- 968 Delsuc, F., Philippe, H., Tsagkogeorga, G., Simion, P., Tilak, M.-K., Turon, X., López-Legentil, S., Piette, J.,  
969 Lemaire, P., Douzery, E.J.P., 2018. A phylogenomic framework and timescale for comparative studies of  
970 tunicates. *BMC Biology* 16, 39.
- 971 Diogo, R., Kelly, R.G., Christiaen, L., Levine, M., Ziermann, J.M., Molnar, J.L., Noden, D.M., Tzahor, E.,  
972 2015. A new heart for a new head in vertebrate cardiopharyngeal evolution. *Nature* 520, 466.
- 973 Dolcemascolo, G., Pennati, R., De Bernardi, F., Damiani, F., Gianguzza, M., 2009. Ultrastructural  
974 comparative analysis on the adhesive papillae of the swimming larvae of three ascidian species.  
975 *Invertebrate Survival Journal* 6, S77-S86.
- 976 Fodor, A.C.A., Liu, J., Turner, L., Swalla, B.J., 2021. Transitional chordates and vertebrate origins:  
977 Tunicates. *Current Topics in Developmental Biology* 139, 325-374.
- 978 Gandhi, S., Haeussler, M., Razy-Krajka, F., Christiaen, L., Stolfi, A., 2017. Evaluation and rational design of  
979 guide RNAs for efficient CRISPR/Cas9-mediated mutagenesis in *Ciona*. *Developmental biology* 425, 8-20.
- 980 Gans, C., Northcutt, R.G., 1983. Neural crest and the origin of vertebrates: a new head. *Science* 220, 268-  
981 273.
- 982 Haeussler, M., Schönig, K., Eckert, H., Eschstruth, A., Mianné, J., Renaud, J.-B., Schneider-Maunoury, S.,  
983 Shkumatava, A., Teboul, L., Kent, J., 2016. Evaluation of off-target and on-target scoring algorithms and  
984 integration into the guide RNA selection tool CRISPOR. *Genome biology* 17, 1-12.

- 985 Haupaix, N., Abitua, P.B., Sirour, C., Yasuo, H., Levine, M., Hudson, C., 2014. Ephrin-mediated restriction  
986 of ERK1/2 activity delimits the number of pigment cells in the *Ciona* CNS. *Developmental Biology* 394,  
987 170-180.
- 988 Haupaix, N., Stolfi, A., Sirour, C., Picco, V., Levine, M., Christiaen, L., Yasuo, H., 2013. p120RasGAP  
989 mediates ephrin/Eph-dependent attenuation of FGF/ERK signals during cell fate specification in ascidian  
990 embryos. *Development* 140, 4347-4352.
- 991 Horie, R., Hazbun, A., Chen, K., Cao, C., Levine, M., Horie, T., 2018. Shared evolutionary origin of  
992 vertebrate neural crest and cranial placodes. *Nature* 560, 228.
- 993 Hotta, K., Dauga, D., Manni, L., 2020. The ontology of the anatomy and development of the solitary  
994 ascidian *Ciona*: the swimming larva and its metamorphosis. *Scientific Reports* 10, 17916.
- 995 Hozumi, A., Matsunobu, S., Mita, K., Treen, N., Sugihara, T., Horie, T., Sakuma, T., Yamamoto, T.,  
996 Shiraishi, A., Hamada, M., 2020. GABA-Induced GnRH Release Triggers Chordate Metamorphosis.  
997 *Current Biology*.
- 998 Hudson, C., Yasuo, H., 2006. A signalling relay involving Nodal and Delta ligands acts during secondary  
999 notochord induction in *Ciona* embryos. *Development* 133, 2855-2864.
- 1000 Ikuta, T., Saiga, H., 2007. Dynamic change in the expression of developmental genes in the ascidian  
1001 central nervous system: revisit to the tripartite model and the origin of the midbrain-hindbrain  
1002 boundary region. *Dev Biol* 312.
- 1003 Imai, J.H., Meinertzhagen, I.A., 2007. Neurons of the ascidian larval nervous system in *Ciona intestinalis*:  
1004 II. Peripheral nervous system. *Journal of Comparative Neurology* 501, 335-352.
- 1005 Karaiskou, A., Swalla, B.J., Sasakura, Y., Chambon, J.P., 2015. Metamorphosis in solitary ascidians.  
1006 *Genesis* 53, 34-47.
- 1007 Kari, W., Zeng, F., Zitzelsberger, L., Will, J., Rothbaecher, U., 2016. Embryo microinjection and  
1008 electroporation in the chordate *Ciona intestinalis*. *JoVE (Journal of Visualized Experiments)*, e54313.
- 1009 Khurana, S., George, S.P., 2008. Regulation of cell structure and function by actin-binding proteins:  
1010 villin's perspective. *FEBS letters* 582, 2128-2139.
- 1011 Kocot, K.M., Tassia, M.G., Halanych, K.M., Swalla, B.J., 2018. Phylogenomics offers resolution of major  
1012 tunicate relationships. *Molecular Phylogenetics and Evolution* 121, 166-173.
- 1013 Kusakabe, T.G., Sakai, T., Aoyama, M., Kitajima, Y., Miyamoto, Y., Takigawa, T., Daido, Y., Fujiwara, K.,  
1014 Terashima, Y., Sugiuchi, Y., 2012. A conserved non-reproductive GnRH system in chordates.
- 1015 Lemaire, P., 2011. Evolutionary crossroads in developmental biology: the tunicates. *Development* 138,  
1016 2143-2152.
- 1017 Liu, B., Ren, X., Satou, Y., 2023. BMP signaling is required to form the anterior neural plate border in  
1018 ascidian embryos. *Development Genes and Evolution*, 1-11.
- 1019 Liu, B., Satou, Y., 2019. Foxg specifies sensory neurons in the anterior neural plate border of the ascidian  
1020 embryo. *Nature communications* 10, 1-10.
- 1021 Martik, M.L., Bronner, M.E., 2021. Riding the crest to get a head: neural crest evolution in vertebrates.  
1022 *Nature Reviews Neuroscience* 22, 616-626.
- 1023 Matsunobu, S., Sasakura, Y., 2015. Time course for tail regression during metamorphosis of the ascidian  
1024 *Ciona intestinalis*. *Developmental biology* 405, 71-81.
- 1025 Nakayama-Ishimura, A., Chambon, J.-p., Horie, T., Satoh, N., Sasakura, Y., 2009. Delineating  
1026 metamorphic pathways in the ascidian *Ciona intestinalis*. *Developmental biology* 326, 357-367.
- 1027 Papadogiannis, V., Pennati, A., Parker, H.J., Rothbächer, U., Patthey, C., Bronner, M.E., Shimeld, S.M.,  
1028 2022. Hmx gene conservation identifies the origin of vertebrate cranial ganglia. *Nature* 605, 701-705.
- 1029 Pasini, A., Amiel, A., Rothbächer, U., Roure, A., Lemaire, P., Darras, S., 2006. Formation of the ascidian  
1030 epidermal sensory neurons: insights into the origin of the chordate peripheral nervous system. *PLoS*  
1031 *biology* 4, e225.

- 1032 Patthey, C., Schlosser, G., Shimeld, S.M., 2014. The evolutionary history of vertebrate cranial placodes—  
1033 cell type evolution. *Developmental biology* 389, 82-97.
- 1034 Pennati, R., Ficetola, G.F., Brunetti, R., Caicci, F., Gasparini, F., Griggio, F., Sato, A., Stach, T., Kaul-  
1035 Strehlow, S., Gissi, C., Manni, L., 2015. Morphological Differences between Larvae of the *Ciona*  
1036 *intestinalis* Species Complex: Hints for a Valid Taxonomic Definition of Distinct Species. *PLOS ONE* 10,  
1037 e0122879.
- 1038 Pennati, R., GropPELLI, S., De Bernardi, F., Mastrototaro, F., Zega, G., 2009. Immunohistochemical  
1039 analysis of adhesive papillae of *Clavelina lepadiformis* (Müller, 1776) and *Clavelina phlegraea* (Salfi,  
1040 1929)(Tunicata, Ascidiacea). *European journal of histochemistry: EJH* 53.
- 1041 Pennati, R., Zega, G., GropPELLI, S., De Bernardi, F., 2007. Immunohistochemical analysis of the adhesive  
1042 papillae of *Botrylloides leachi* (Chordata, Tunicata, Ascidiacea): Implications for their sensory function.  
1043 *Italian Journal of Zoology* 74, 325-329.
- 1044 Poncelet, G., Shimeld, S.M., 2020. The evolutionary origins of the vertebrate olfactory system. *Open*  
1045 *Biology* 10, 200330.
- 1046 Poncelet, G.J.F., Parolini, L., Shimeld, S., 2022. A microfluidic device for controlled exposure of  
1047 transgenic *Ciona intestinalis* larvae to chemical stimuli demonstrates they can respond to carbon  
1048 dioxide. *bioRxiv*, 2022-2008.
- 1049 Pottin, K., Hyacinthe, C., Rétaux, S., 2010. Conservation, development, and function of a cement gland-  
1050 like structure in the fish *Astyanax mexicanus*. *Proceedings of the National Academy of Sciences* 107,  
1051 17256-17261.
- 1052 Razy-Krajka, F., Lam, K., Wang, W., Stolfi, A., Joly, M., Bonneau, R., Christiaen, L., 2014. Collier/OLF/EBF-  
1053 dependent transcriptional dynamics control pharyngeal muscle specification from primed  
1054 cardiopharyngeal progenitors. *Developmental cell* 29, 263-276.
- 1055 Rétaux, S., Pottin, K., 2011. A question of homology for chordate adhesive organs. *Communicative &*  
1056 *Integrative Biology* 4, 75-77.
- 1057 Roure, A., Chowdhury, R., Darras, S., 2022. Regulation of anterior neurectoderm specification and  
1058 differentiation by BMP signaling in ascidians. *bioRxiv*, 2022-2010.
- 1059 Roure, A., Darras, S., 2016. *Msx* is a core component of the genetic circuitry specifying the dorsal and  
1060 ventral neurogenic midlines in the ascidian embryo. *Developmental biology* 409, 277-287.
- 1061 Sakamoto, A., Hozumi, A., Shiraishi, A., Satake, H., Horie, T., Sasakura, Y., 2022. The TRP channel PKD2 is  
1062 involved in sensing the mechanical stimulus of adhesion for initiating metamorphosis in the chordate  
1063 *Ciona*. *Development, Growth & Differentiation* 64, 395-408.
- 1064 Sasakura, Y., Nakashima, K., Awazu, S., Matsuoka, T., Nakayama, A., Azuma, J., Satoh, N., 2005.  
1065 Transposon-mediated insertional mutagenesis revealed the functions of animal cellulose synthase in the  
1066 ascidian *Ciona intestinalis*. *Proceedings of the National Academy of Sciences of the United States of*  
1067 *America* 102, 15134.
- 1068 Satija, R., Farrell, J.A., Gennert, D., Schier, A.F., Regev, A., 2015. Spatial reconstruction of single-cell gene  
1069 expression data. *Nature biotechnology* 33, 495.
- 1070 Satoh, N., 2013. *Developmental genomics of ascidians*. John Wiley & Sons.
- 1071 Satou, Y., Sato, A., Yasuo, H., Mihiroggi, Y., Bishop, J., Fujie, M., Kawamitsu, M., Hisata, K., Satoh, N., 2021.  
1072 Chromosomal inversion polymorphisms in two sympatric ascidian lineages. *Genome biology and*  
1073 *evolution* 13, evab068.
- 1074 Satou, Y., Tokuoka, M., Oda-Ishii, I., Tokuhira, S., Ishida, T., Liu, B., Iwamura, Y., 2022. A manually  
1075 curated gene model set for an ascidian, *Ciona robusta* (*Ciona intestinalis* type A). *Zoological Science* 39.
- 1076 Sharma, S., Wang, W., Stolfi, A., 2019. Single-cell transcriptome profiling of the *Ciona* larval brain.  
1077 *Developmental Biology* 448, 226-236.
- 1078 Shimeld, S.M., Purkiss, A.G., Dirks, R.P.H., Bateman, O.A., Slingsby, C., Lubsen, N.H., 2005. Urochordate  
1079  $\beta$ -crystallin and the evolutionary origin of the vertebrate eye lens. *Current biology* 15, 1684-1689.

1080 Song, M., Yuan, X., Racioppi, C., Leslie, M., Stutt, N., Aleksandrova, A., Christiaen, L., Wilson, M.D., Scott,  
1081 I.C., 2022. GATA4/5/6 family transcription factors are conserved determinants of cardiac versus  
1082 pharyngeal mesoderm fate. *Science Advances* 8, eabg0834.  
1083 Stolfi, A., Gandhi, S., Salek, F., Christiaen, L., 2014. Tissue-specific genome editing in *Ciona* embryos by  
1084 CRISPR/Cas9. *Development* 141, 4115-4120.  
1085 Stolfi, A., Levine, M., 2011. Neuronal subtype specification in the spinal cord of a protovertebrate.  
1086 *Development* 138, 995-1004.  
1087 Stolfi, A., Wagner, E., Taliaferro, J.M., Chou, S., Levine, M., 2011. Neural tube patterning by Ephrin, FGF  
1088 and Notch signaling relays. *Development* 138, 5429-5439.  
1089 Tang, W.J., Chen, J.S., Zeller, R.W., 2013. Transcriptional regulation of the peripheral nervous system in  
1090 *Ciona intestinalis*. *Developmental biology* 378, 183-193.  
1091 Tolkin, T., Christiaen, L., 2016. Rewiring of an ancestral Tbx1/10-Ebf-Mrf network for pharyngeal muscle  
1092 specification in distinct embryonic lineages. *Development* 143, 3852-3862.  
1093 Torrence, S.A., Cloney, R.A., 1983. Ascidian larval nervous system: primary sensory neurons in adhesive  
1094 papillae. *Zoomorphology* 102, 111-123.  
1095 Turon, X., 1991. Morphology of the adhesive papillae of some ascidian larvae. *Cah. Biol. Mar* 32, 295-  
1096 309.  
1097 Wagner, E., Stolfi, A., Choi, Y.G., Levine, M., 2014. Islet is a key determinant of ascidian palp  
1098 morphogenesis. *Development* 141, 3084-3092.  
1099 Wakai, M.K., Nakamura, M.J., Sawai, S., Hotta, K., Oka, K., 2021. Two-Round Ca<sup>2+</sup> transient in papillae by  
1100 mechanical stimulation induces metamorphosis in the ascidian *Ciona intestinalis* type A. *Proceedings of*  
1101 *the Royal Society B* 288, 20203207.  
1102 Waki, K., Imai, K.S., Satou, Y., 2015. Genetic pathways for differentiation of the peripheral nervous  
1103 system in ascidians. *Nature communications* 6, 8719.  
1104 Zeng, F., Wunderer, J., Salvenmoser, W., Ederth, T., Rothbacher, U., 2019a. Identifying adhesive  
1105 components in a model tunicate. *Philosophical Transactions of the Royal Society B* 374, 20190197.  
1106 Zeng, F., Wunderer, J., Salvenmoser, W., Hess, M.W., Ladurner, P., Rothbacher, U., 2019b. Papillae  
1107 revisited and the nature of the adhesive secreting colocytes. *Developmental biology* 448(2), 183-198.  
1108
